# Supplementary material for: Unique Interaction between Layered Black Phosphorus and Nitrogen Dioxide
Source: MDPI journal article supplement (doi:10.3390/nano12122011), 2022-06-10
Supplement: s1 [file s1]

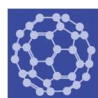

Supporting Information

# Unique Interaction between Layered Black Phosphorus and Nitrogen Dioxide

Jingjing Zhao <sup>1,2</sup>, Xuejiao Zhang <sup>1</sup>, Qing Zhao <sup>1,3,4</sup>, Xue-Feng Yu <sup>5</sup>, Siyu Zhang <sup>1,\*</sup> and Baoshan Xing <sup>6</sup>

<sup>1</sup> Key Laboratory of Pollution Ecology and Environmental Engineering, Institute of Applied Ecology, Chinese Academy of Sciences, Shenyang 110016, China; zjj911051836@126.com (J.Z.); zhangxuejiao@iae.ac.cn (X.Z.); zhaoqing@iae.ac.cn (Q.Z.)

<sup>2</sup> Shenyang Institute of Applied Ecology, University of Chinese Academy of Sciences, Beijing 100049, China

<sup>3</sup> Key Laboratory of Integrated Agro-Environmental Pollution Control and Management, Institute of Eco-Environmental and Soil Sciences, Guangdong Academy of Sciences, Guangzhou 510650, China

<sup>4</sup> China National-Regional Joint Engineering Research Center for Soil Pollution Control and Remediation in South China, Guangzhou 510650, China

<sup>5</sup> Materials and Interfaces Center, Shenzhen Institutes of Advanced Technology, Chinese Academy of Sciences, Shenzhen 518055, China; xf.yu@siat.ac.cn

<sup>6</sup> Stockbridge School of Agriculture, University of Massachusetts, Amherst, MA 01003, USA; bx@umass.edu

\* Correspondence: syzhang@iae.ac.cn; Tel.: +86-24-8397-0383

**Citation:** Zhao, J.; Zhang, X.; Zhao, Q.; Yu, X.-F.; Zhang, S.; Xing, B. Unique Interaction between Layered Black Phosphorus and Nitrogen Dioxide. *Nanomaterials* **2022**, *12*, 2011. <https://doi.org/10.3390/nano12122011>

Academic Editor: Yu-Chun Chiang

Received: 18 April 2022

Accepted: 6 June 2022

Published: 10 June 2022

**Publisher's Note:** MDPI stays neutral with regard to jurisdictional claims in published maps and institutional affiliations.

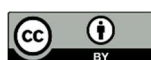

**Copyright:** © 2022 by the authors. Licensee MDPI, Basel, Switzerland. This article is an open access article distributed under the terms and conditions of the Creative Commons Attribution (CC BY) license (<https://creativecommons.org/licenses/by/4.0/>).

## Table of Contents

|                                                                                                                                                                                                                                                                                                                                                                                                                                                                                                                                             |    |
|---------------------------------------------------------------------------------------------------------------------------------------------------------------------------------------------------------------------------------------------------------------------------------------------------------------------------------------------------------------------------------------------------------------------------------------------------------------------------------------------------------------------------------------------|----|
| <b>Figure S1.</b> Valence electrons in the outmost valence shell of gas molecules: (a) NO <sub>2</sub> , (b) SO <sub>2</sub> , (c) CO <sub>2</sub> , (d) NO, (e) CO and (f) NH <sub>3</sub> .                                                                                                                                                                                                                                                                                                                                               | 1  |
| <b>Figure S2.</b> Honeycomb wrinkled atomic structural diagram of SLBP.                                                                                                                                                                                                                                                                                                                                                                                                                                                                     | 1  |
| <b>Figure S3.</b> Variations of $E_{ad}$ (eV) with $d_{shortest}$ (Å) or orientations of gas molecule: (a) NO <sub>2</sub> , (b) SO <sub>2</sub> , (c) CO <sub>2</sub> , (d) NO, (e) CO and (f) NH <sub>3</sub> .                                                                                                                                                                                                                                                                                                                           | 2  |
| <b>Figure S4.</b> Variations of $E_{ad}$ (eV) with $d_{shortest}$ (Å) or types of adsorption sites in fully-optimized configurations of adsorption complexes: (a) NO <sub>2</sub> , (b) SO <sub>2</sub> , (c) CO <sub>2</sub> , (d) NO, (e) CO and (f) NH <sub>3</sub> .                                                                                                                                                                                                                                                                    | 2  |
| <b>Figure S5.</b> Side and top views of thermodynamically favorable adsorption configurations of gas molecules on SLBP: (a) NO <sub>2</sub> -2Ovz, (b) NO <sub>2</sub> -Nva, (c) NO <sub>2</sub> -Nvz, (d) SO <sub>2</sub> -pz, (e) SO <sub>2</sub> -Svz, (f) SO <sub>2</sub> -pa, (g) CO <sub>2</sub> -pa, (h) NO-pa, (i) CO-pa, (j) CO-pa and (k) NH <sub>3</sub> -Nva.                                                                                                                                                                   | 3  |
| <b>Figure S6.</b> Modified interaction energies ( $E_{ad-def}$ , eV) of the lowest-energy adsorption configurations calculated for NO <sub>2</sub> , SO <sub>2</sub> or CO <sub>2</sub> on d-SLBP.                                                                                                                                                                                                                                                                                                                                          | 4  |
| <b>Figure S7.</b> Side and top views of the energetically stable adsorption configurations calculated for NO (a ~ d) and NH <sub>3</sub> (e ~ h) on SV (a, e), DV3 (b, f), EGz1 (c, g) and EGz2 (d, h).                                                                                                                                                                                                                                                                                                                                     | 4  |
| <b>Figure S8.</b> TDOS of adsorption complexes of NO and d-SLBP and PDOS of d-SLBP in adsorption complexes. (a) SV, (b) DV3, (c) EGz1 and (d) EGz2.                                                                                                                                                                                                                                                                                                                                                                                         | 5  |
| <b>Figure S9.</b> Initial configurations of SLBP and d-SLBP: (a) SLBP, (b) SW1, (c) SW2, (d) SV, (e) DV1, (f) DV2, (g) DV3, (h) EGz1, (i) EGz2, (j) EGa1 and (k) EGa2.                                                                                                                                                                                                                                                                                                                                                                      | 6  |
| <b>Figure S10.</b> Initial configurations of NO <sub>2</sub> molecule adsorbed onto SLBP: (a) 1Ov, (b) Nva, (c) Nvz, (d) 2Ova, (e) 2Ovz, (f) pa, (g) pz.                                                                                                                                                                                                                                                                                                                                                                                    | 6  |
| <b>Figure S11.</b> Initial configurations of SO <sub>2</sub> molecule adsorbed onto SLBP: (a) 1Ov, (b) Sva, (c) Svz, (d) 2Ova, (e) 2Ovz, (f) pa, (g) pz.                                                                                                                                                                                                                                                                                                                                                                                    | 7  |
| <b>Figure S12.</b> Initial configurations of CO <sub>2</sub> molecule adsorbed onto SLBP: (a) Ov, (b) pa, (c) pz.                                                                                                                                                                                                                                                                                                                                                                                                                           | 7  |
| <b>Figure S13.</b> Initial configurations of NO molecule adsorbed onto SLBP: (a) Nv, (b) Ov, (c) pa, (d) pz.                                                                                                                                                                                                                                                                                                                                                                                                                                | 7  |
| <b>Figure S14.</b> Initial configurations of CO molecule adsorbed onto SLBP: (a) Cv, (b) Ov, (c) pa, (d) pz.                                                                                                                                                                                                                                                                                                                                                                                                                                | 8  |
| <b>Figure S15.</b> Initial configurations of NH <sub>3</sub> molecule adsorbed onto SLBP: (a) 1Hv, (b) 3Hv, (c) Nva, (d) Nvz.                                                                                                                                                                                                                                                                                                                                                                                                               | 8  |
| <b>Figure S16.</b> Convergence tests of cutoff energy (a) and k-point grid (b).                                                                                                                                                                                                                                                                                                                                                                                                                                                             | 9  |
| <b>Figure S17.</b> Side and top views of the most energetically stable adsorption configurations calculated for NO <sub>2</sub> and d-SLBP. (a) SW1-NO <sub>2</sub> , (b) SW2-NO <sub>2</sub> , (c) SV-NO <sub>2</sub> , (d) DV1-NO <sub>2</sub> , (e) DV2-NO <sub>2</sub> , (f) DV3-NO <sub>2</sub> , (g) EGz1-NO <sub>2</sub> , (h) EGz2-NO <sub>2</sub> , (i) EGa1-NO <sub>2</sub> and (j) EGa2-NO <sub>2</sub> .                                                                                                                        | 15 |
| <b>Figure S18.</b> Side and top views of the most energetically stable adsorption configurations of SO <sub>2</sub> on d-SLBP. (a) SW1-SO <sub>2</sub> , (b) SW2-SO <sub>2</sub> , (c) SV-SO <sub>2</sub> , (d) DV1-SO <sub>2</sub> , (e) DV2-SO <sub>2</sub> , (f) DV3-SO <sub>2</sub> , (g) EGz1-SO <sub>2</sub> , (h) EGz2-SO <sub>2</sub> , (i) EGa1-SO <sub>2</sub> and (j) EGa2-SO <sub>2</sub> .                                                                                                                                     | 16 |
| <b>Figure S19.</b> Side and top views of the most energetically stable adsorption configurations of CO <sub>2</sub> on d-SLBP. (a) SW1-CO <sub>2</sub> , (b) SW2-CO <sub>2</sub> , (c) SV-CO <sub>2</sub> , (d) DV1-CO <sub>2</sub> , (e) DV2-CO <sub>2</sub> , (f) DV3-CO <sub>2</sub> , (g) EGz1-CO <sub>2</sub> , (h) EGz2-CO <sub>2</sub> , (i) EGa1-CO <sub>2</sub> and (j) EGa2-CO <sub>2</sub> .                                                                                                                                     | 17 |
| <b>Figure S20.</b> Side and top views of the desorption configuration.                                                                                                                                                                                                                                                                                                                                                                                                                                                                      | 19 |
| <b>Figure S21.</b> Side and top views of deformed DV3 after adsorption.                                                                                                                                                                                                                                                                                                                                                                                                                                                                     | 20 |
| <b>Figure S22.</b> Total density of states (TDOS) of SLBP and d-SLBP and partial DOS (PDOS) of key phosphorus atoms contributing to changes of total DOS. (a) Atom P <sub>17</sub> in SLBP, (b) atom P <sub>17</sub> in SW1, (c) atom P <sub>17</sub> in SW2, (d) atom P <sub>17</sub> in SV, (e) atom P <sub>17</sub> in DV1, (f) atom P <sub>20</sub> in DV2, (g) atom P <sub>17</sub> in DV3, (h) atom P <sub>31</sub> in EGz1, (i) atom P <sub>27</sub> in EGz2, (j) atom P <sub>21</sub> in EGa1 and (k) atom P <sub>11</sub> in EGa2. | 22 |
| <b>Figure S23.</b> Band structures and DOS patterns of SLBP and gas adsorption complexes. (a) NO <sub>2</sub> , (b) SO <sub>2</sub> , (c) CO <sub>2</sub> , (d) NO, (e) CO, (f) NH <sub>3</sub> .                                                                                                                                                                                                                                                                                                                                           | 23 |
| <b>Figure S24.</b> TDOS of adsorption complexes of d-SLBP and NO <sub>2</sub> and PDOS of d-SLBP in adsorption complexes. (a) SW1, (b) SW2, (c) SV, (d) DV1, (e) DV2, (f) DV3, (g) EGz1, (h) EGz2, (i) EGa1 and (j) EGa2.                                                                                                                                                                                                                                                                                                                   | 24 |
| <b>Figure S25.</b> TDOS of adsorption complexes of d-SLBP and SO <sub>2</sub> and PDOS of d-SLBP in adsorption complexes. (a) SW1, (b) SW2, (c) SV, (d) DV1, (e) DV2, (f) DV3, (g) EGz1, (h) EGz2, (i) EGa1 and (j) EGa2.                                                                                                                                                                                                                                                                                                                   | 25 |
| <b>Figure S26.</b> TDOS of adsorption complexes of CO <sub>2</sub> and d-SLBP and PDOS of d-SLBP in adsorption complexes. (a) SW1, (b) SW2, (c) SV, (d) DV1, (e) DV2, (f) DV3, (g) EGz1, (h) EGz2, (i) EGa1 and (j) EGa2.                                                                                                                                                                                                                                                                                                                   | 26 |

|                                                                                                                                                                                                                                                                                                       |           |
|-------------------------------------------------------------------------------------------------------------------------------------------------------------------------------------------------------------------------------------------------------------------------------------------------------|-----------|
| <b>Figure S27.</b> Characterizations of LBP. (a) Raman spectrum of LBP; (b) TEM image of LBP. ....                                                                                                                                                                                                    | <b>28</b> |
| <b>Table S1.</b> Formation energies ( $E_f$ , eV) of defects in LBP and graphene .....                                                                                                                                                                                                                | <b>13</b> |
| <b>Table S2.</b> Adsorption energies ( $E_{ad}$ , eV), $E_{vdW}/E_{ad}$ (%), the shortest distances ( $d_{shortest}$ , Å) and charge transfer ( $\Delta q$ , e) of the lowest-energy adsorption configurations of NO <sub>2</sub> , SO <sub>2</sub> and CO <sub>2</sub> on SLBP and each d-SLBP ..... | <b>18</b> |
| <b>Table S3.</b> Charge and spin population on each atom in the desorption configuration of SV absorbing NO <sub>2</sub> by Mulliken Atomic Populations .....                                                                                                                                         | <b>19</b> |
| <b>Table S4.</b> Interaction energies ( $E_{ad}$ , eV), deformation energies ( $E_{def}$ , eV) and modified interaction energies ( $E_{ad-def}$ , eV) for d-SLBP and dioxides .....                                                                                                                   | <b>21</b> |

## Text Table of Contents

|                                                                                                 |           |
|-------------------------------------------------------------------------------------------------|-----------|
| <b>S1.</b> Initially Constructed Adsorbate and Adsorption Complex Configurations .....          | <b>5</b>  |
| <b>S2.</b> Calculation Method .....                                                             | <b>8</b>  |
| <b>S3.</b> Computational Results on Adsorption of Gas Molecules on Perfect SLBP .....           | <b>10</b> |
| <b>S4.</b> The Most Stable Configuration of Gas Molecule on SLBP and Related Disputes .....     | <b>10</b> |
| <b>S5.</b> Computational Results on Individual d-SLBP .....                                     | <b>14</b> |
| <b>S6.</b> Computational Results on Adsorption of Gas Molecules on d-SLBP .....                 | <b>14</b> |
| <b>S7.</b> Nature of the [NO] Species .....                                                     | <b>19</b> |
| <b>S8.</b> Deformation of DV3 after interacting with gas molecules .....                        | <b>20</b> |
| <b>S9.</b> Single Electron Dominated Mechanism for SLBP or d-SLBP Absorbing Gas Molecules ..... | <b>21</b> |
| <b>S10.</b> Experimental Details .....                                                          | <b>27</b> |

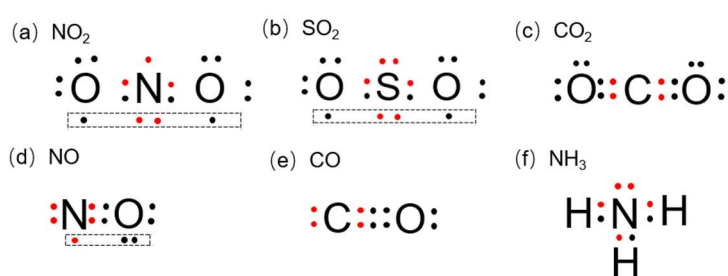

**Figure S1.** Valence electrons in the outmost valence shell of gas molecules: (a) NO<sub>2</sub>, (b) SO<sub>2</sub>, (c) CO<sub>2</sub>, (d) NO, (e) CO and (f) NH<sub>3</sub>.

Red and black dots represent valence electrons. A dashed box refers to a special bonding type.

Figure S1 shows outmost valence electrons of gas molecules. The valence bond theory has no clear conclusion on the electronic structure of NO<sub>2</sub>. The most accepted point of view is that NO<sub>2</sub> has a three-center, four-electron  $\pi$  bond [1]. Nitrogen is  $sp^2$  hybridized in NO<sub>2</sub>. Two of three  $sp^2$  orbital electrons of NO<sub>2</sub> form two N–O single bonds with  $p$  orbital electrons of the oxygen atom, and the last  $sp^2$  electron is unpaired. The other two paired valence electrons of the nitrogen atom and two electrons from two oxygen atoms form a four-electron, three-center  $\pi$  bond (Figure S1a). SO<sub>2</sub> has a four-electron, three-center  $\pi$  bond containing no single electron (Figure S1b). Two  $sp$  hybrid orbitals of carbon atoms form two  $\sigma$  bonds with two oxygen atoms in CO<sub>2</sub> (Figure S1c). NO has an odd number of valence electrons. Differently from NO<sub>2</sub>, the single electron of NO is in a two-center three-electron bond (Figure S1d) [2]. In CO, two electrons of the carbon atom and two electrons of the oxygen atom form two covalent bonds, and the lone pair electron of the oxygen atom and an empty  $p$  orbital of the carbon atom form a coordinate bond, forming a total of three covalent bonds (Figure S1e) [3]. In NH<sub>3</sub>, the nitrogen atom has five valence electrons, of which the three unpaired combine with three hydrogen atoms (Figure S1f).

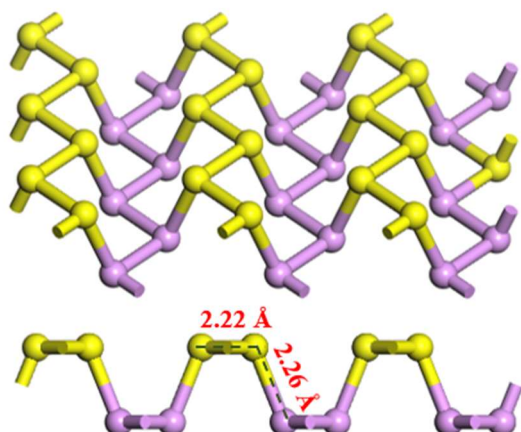

**Figure S2.** Honeycomb wrinkled atomic structural diagram of SLBP.

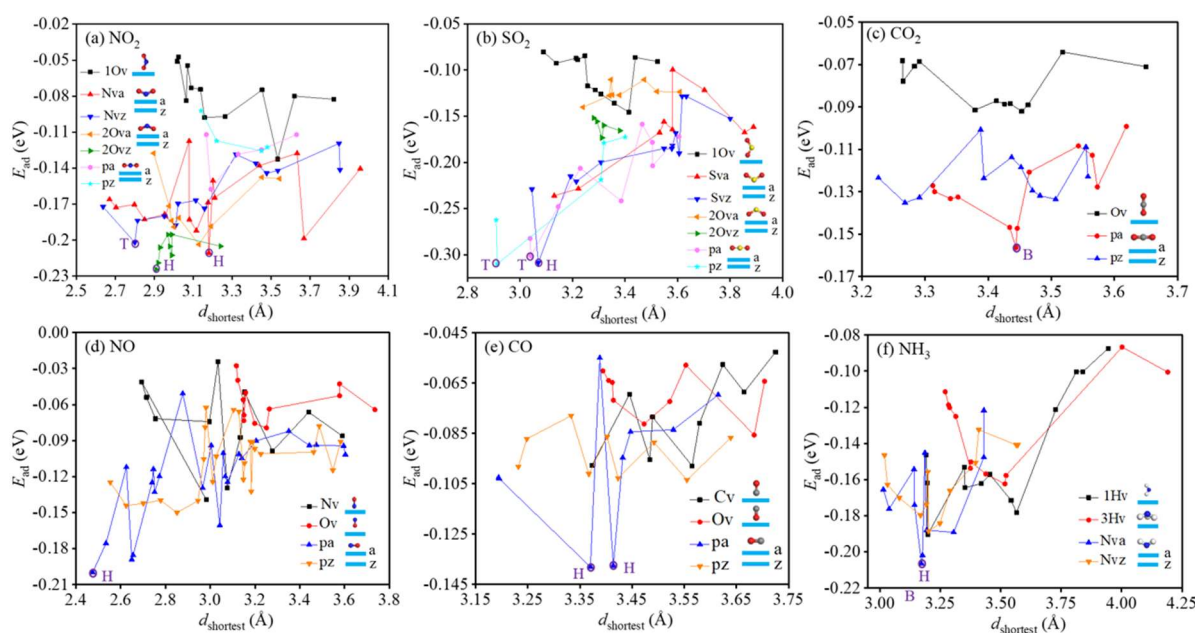

**Figure S3.** Variations of  $E_{ad}$  (eV) with  $d_{shortest}$  (Å) or orientations of gas molecule: (a)  $\text{NO}_2$ , (b)  $\text{SO}_2$ , (c)  $\text{CO}_2$ , (d)  $\text{NO}$ , (e)  $\text{CO}$  and (f)  $\text{NH}_3$ . **1Ov**: one of two oxygen atoms in nonlinear  $\text{NO}_2$  and  $\text{SO}_2$  points to SLBP. **Nva** (**Sva**) or **Nvz** (**Svz**): nitrogen (sulfur) atom of nonlinear  $\text{NO}_2$  or  $\text{NH}_3$  ( $\text{SO}_2$ ) points to the SLBP and the molecule is an armchair or zigzag shape. **2Ova** or **2Ovz**: two oxygen atoms of nonlinear  $\text{NO}_2$  and  $\text{SO}_2$  point to SLBP and the molecule is an armchair or zigzag shape. **pa** or **pz**: a gas molecule is parallel to the SLBP plane in armchair or zigzag shape. **Ov**, **Nv** or **Cv**: single oxygen, nitrogen or carbon atom of linear  $\text{CO}_2$ ,  $\text{NO}$  or  $\text{CO}$  points to the SLBP plane. **1Hv** or **3Hv**: 1 or 3 hydrogen atoms of  $\text{NH}_3$  point to the SLBP plane.

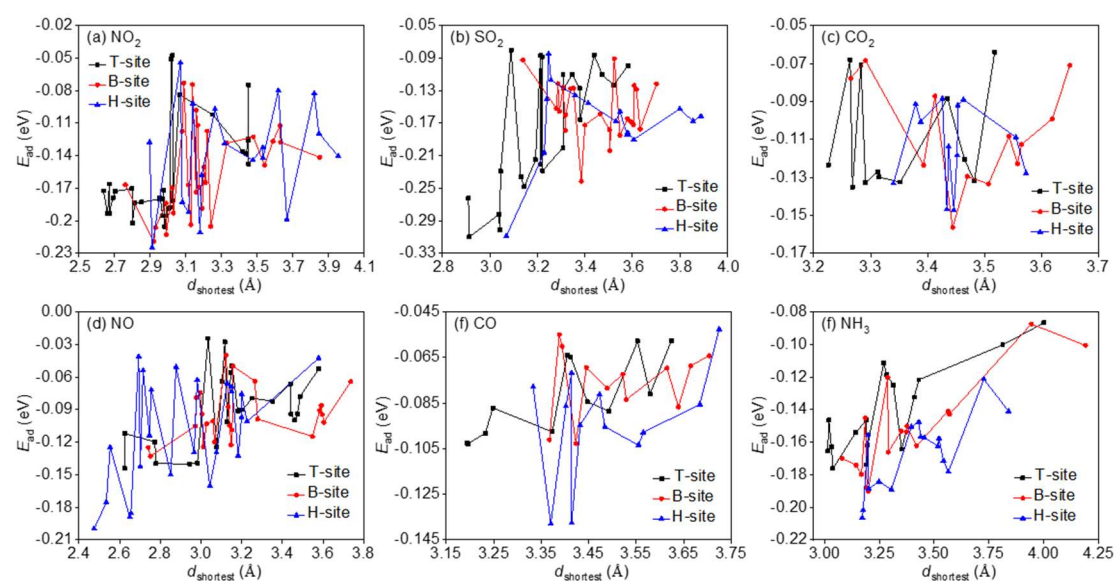

**Figure S4.** Variations of  $E_{ad}$  (eV) with  $d_{shortest}$  or types of adsorption sites in fully-optimized configurations of adsorption complexes:

(a)  $NO_2$ , (b)  $SO_2$ , (c)  $CO_2$ , (d)  $NO$ , (e)  $CO$  and (f)  $NH_3$ .

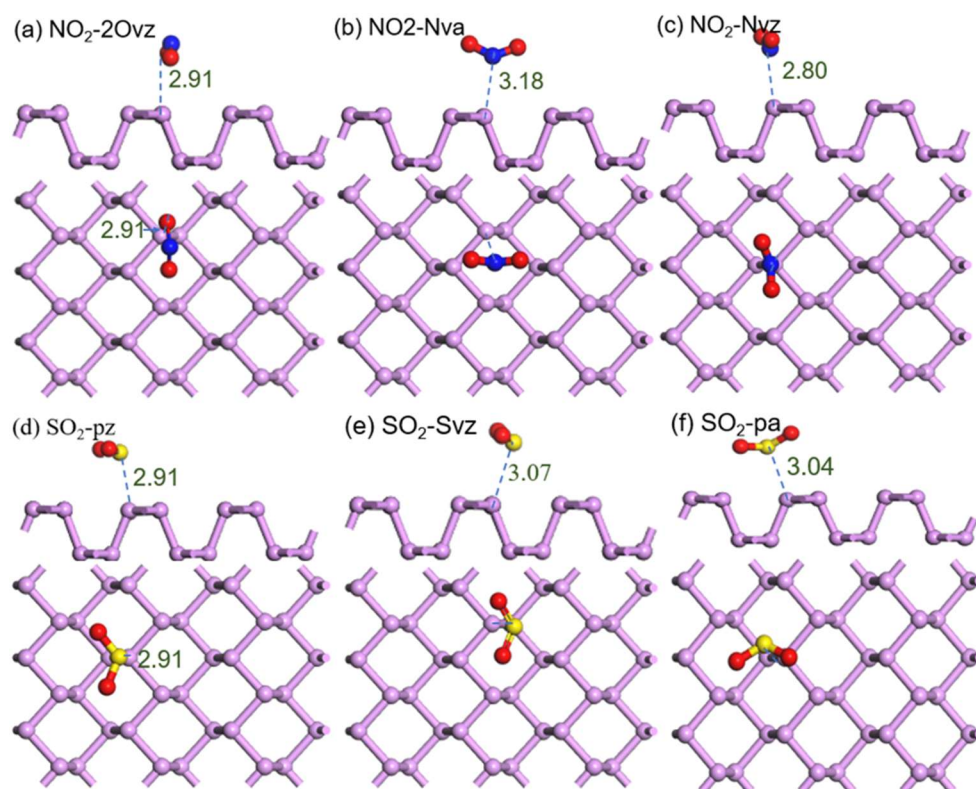



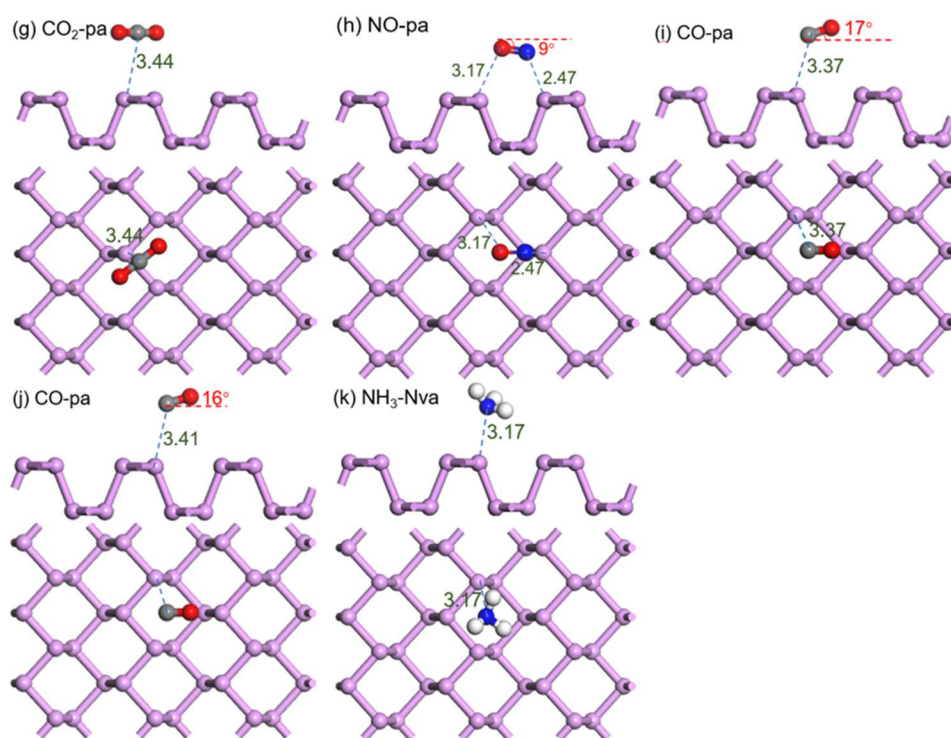

**Figure S5.** Side and top views of thermodynamically favorable adsorption configurations of gas molecules on SLBP: (a)  $\text{NO}_2$ -2Ovz, (b)  $\text{NO}_2$ -Nva, (c)  $\text{NO}_2$ -Nvz, (d)  $\text{SO}_2$ -pz, (e)  $\text{SO}_2$ -Svz, (f)  $\text{SO}_2$ -pa, (g)  $\text{CO}_2$ -pa, (h)  $\text{NO}$ -pa, (i)  $\text{CO}$ -pa, (j)  $\text{CO}$ -pa and (k)  $\text{NH}_3$ -Nva. Green numbers represent  $d_{\text{shortest}}$  values between SLBP and gases. Red numbers are dihedral angles between the gas and the SLBP plane.

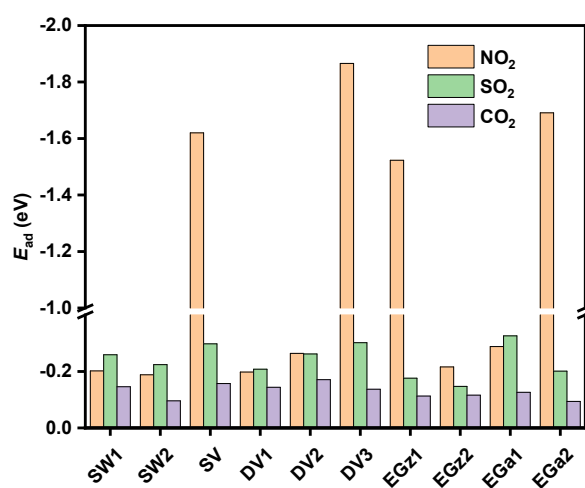

**Figure S6.** Modified interaction energies ( $E_{\text{ad-def}}$ , eV) of the lowest-energy adsorption configurations calculated for  $\text{NO}_2$ ,  $\text{SO}_2$  or  $\text{CO}_2$  on d-SLBP.

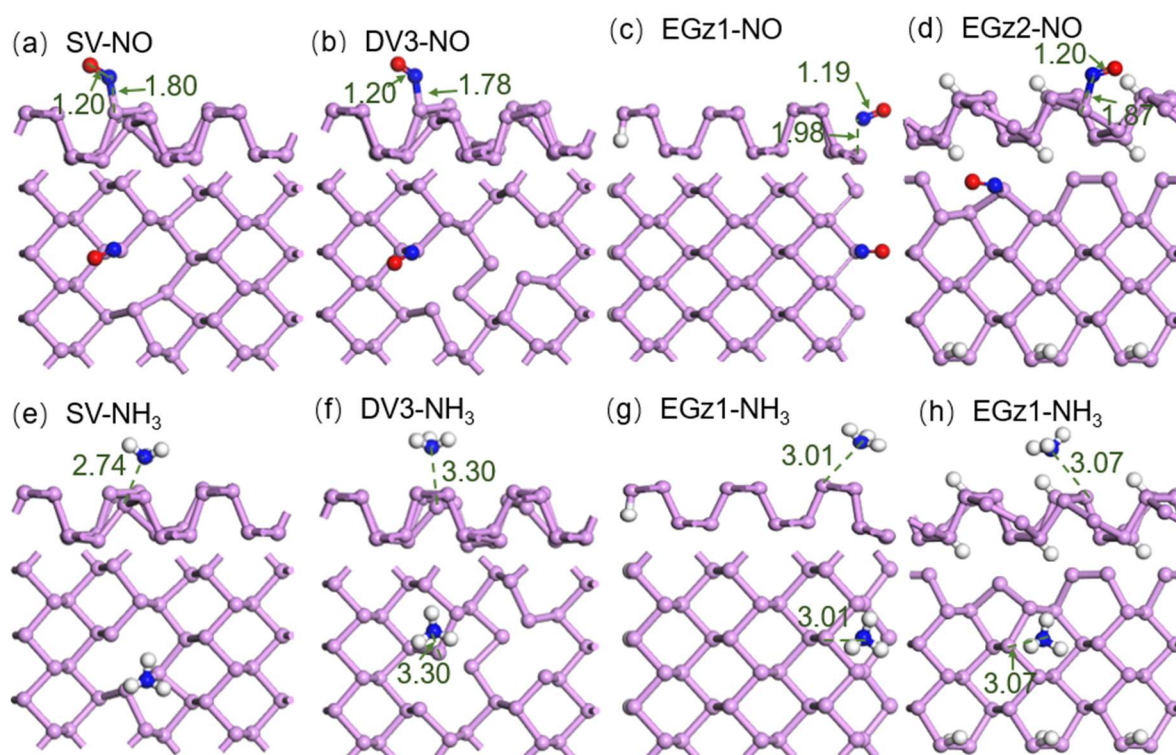

**Figure S7.** Side and top views of the energetically stable adsorption configurations calculated for NO (a ~ d) and NH<sub>3</sub> (e ~ h) on SV (a, e), DV3 (b, f), EGz1 (c, g) and EGz2 (d, h). Green numbers: the shortest atomic distances ( $d_{\text{shortest}}$ ) between d-SLBP and gas molecules.

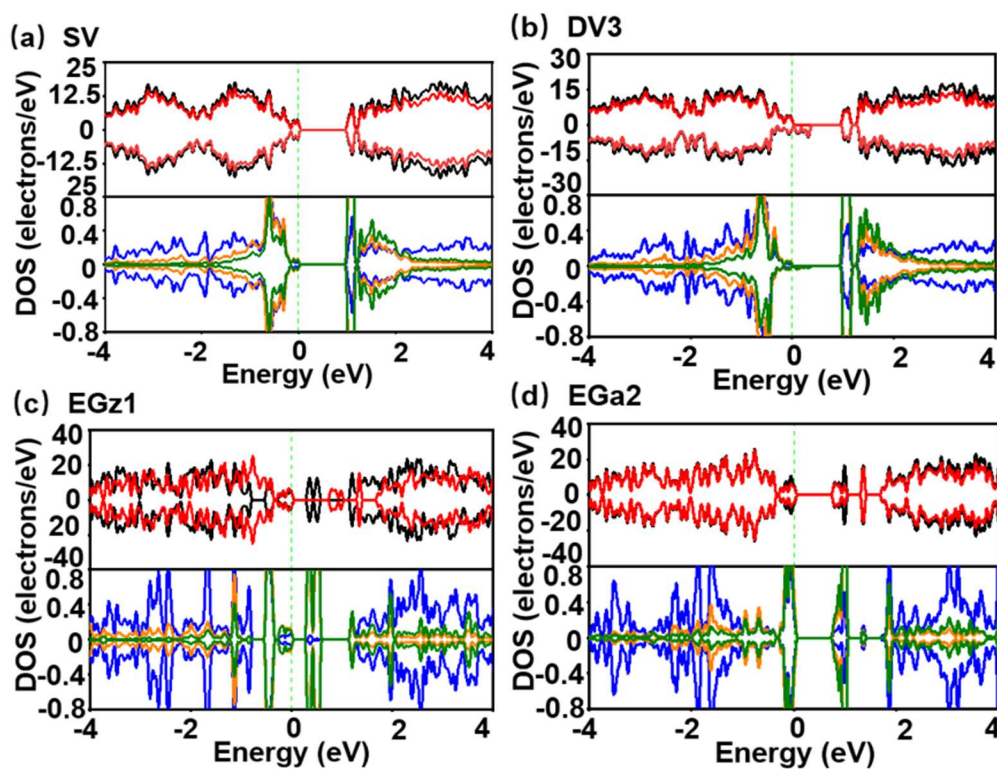

**Figure S8.** TDOS of adsorption complexes of NO and d-SLBP (black solid line) and PDOS of d-SLBP (red solid line) in adsorption complexes (upper panel). (a) SV, (b) DV3, (c) EGz1 and (d) EGa2. PDOS of *p* orbitals of oxygen (orange solid line) and nitrogen (dark green solid line) atoms and the phosphorus atom (blue solid line) nearest to NO (lower panel). Green dashed line: Fermi level.

### S1. Initially Constructed Adsorbate and Adsorption Complex Configurations

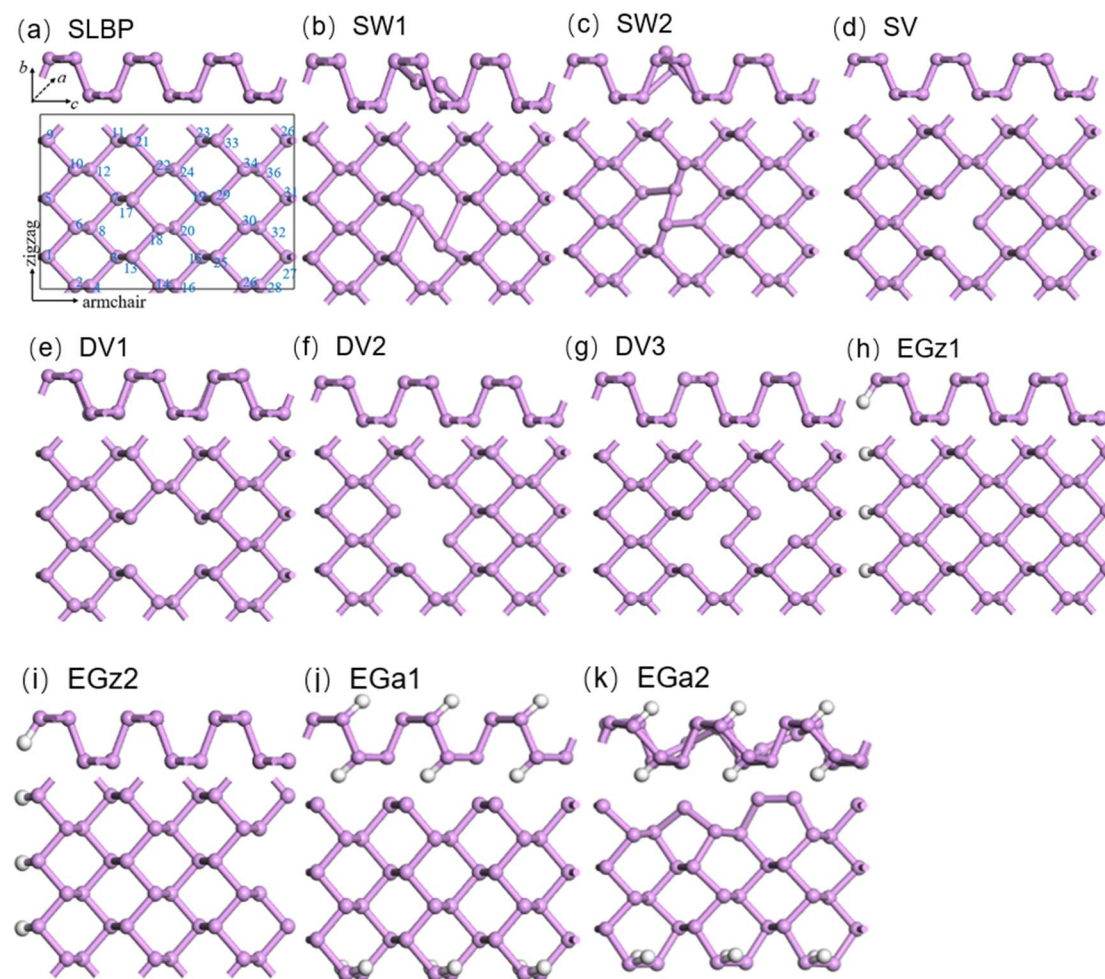

**Figure S9.** Initial configurations of SLBP and d-SLBP: (a) SLBP, (b) SW1, (c) SW2, (d) SV, (e) DV1, (f) DV2, (g) DV3, (h) EGz1, (i) EGz2, (j) EGa1 and (k) EGa2.



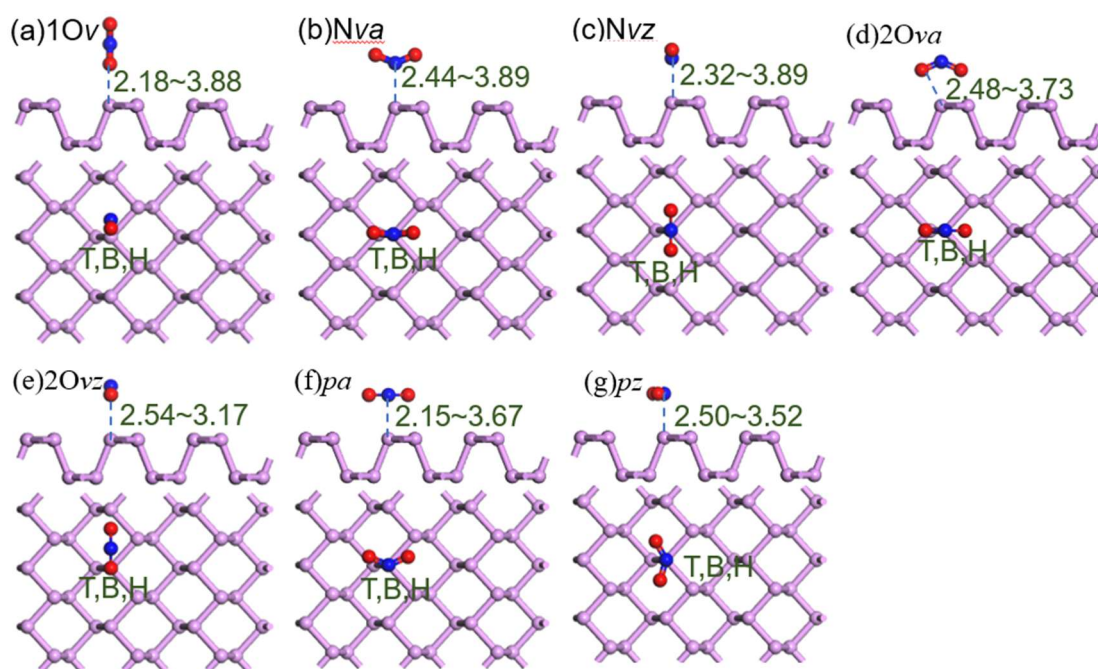

**Figure S10.** Initial configurations of  $\text{NO}_2$  molecules adsorbed onto SLBP: (a) 1Ov, (b) Nva, (c) Nvz, (d) 2Ova, (e) 2Ovz, (f) pa, (g)

pz.

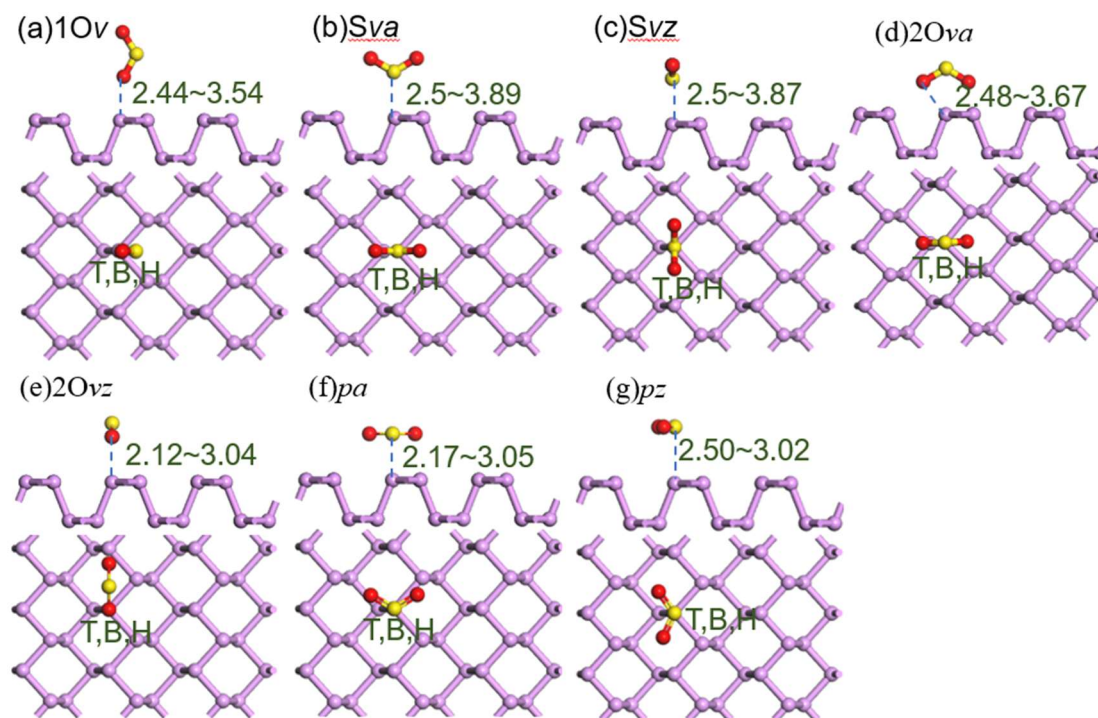

**Figure S11.** Initial configurations of  $\text{SO}_2$  molecules adsorbed onto SLBP: (a) 1Ov, (b) Sva, (c) Svz, (d) 2Ova, (e) 2Ovz, (f) pa, (g)

pz.

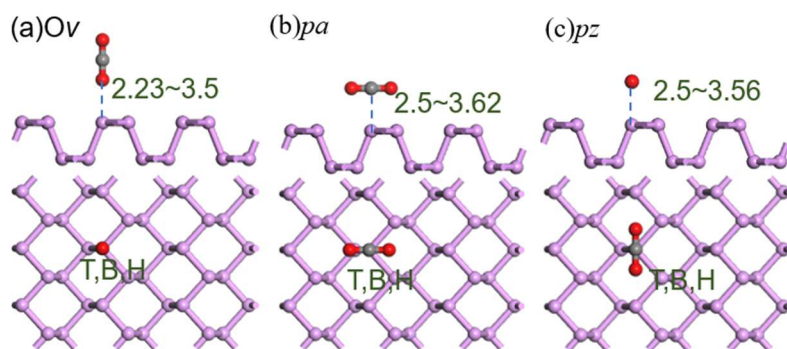

**Figure S12.** Initial configurations of CO<sub>2</sub> molecules adsorbed onto SLBP: (a) **Ov**, (b) **pa**, (c) **pz**.

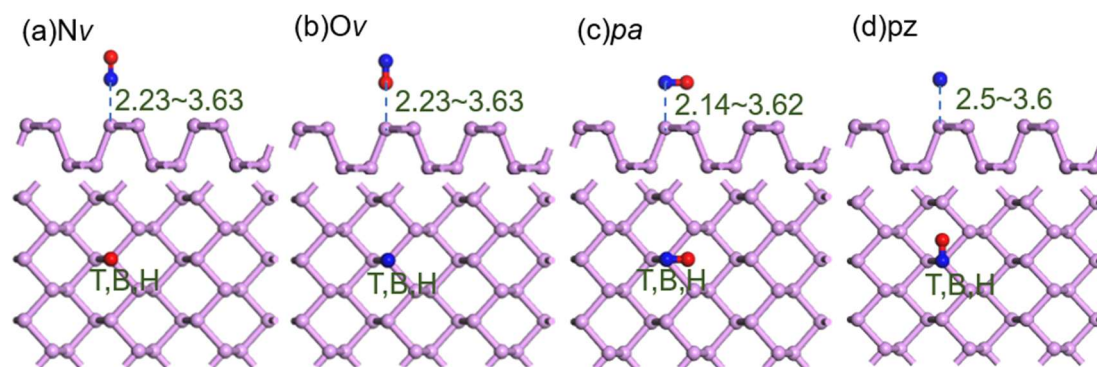

**Figure S13.** Initial configurations of NO molecules adsorbed onto SLBP: (a) **Nv**, (b) **Ov**, (c) **pa** (d) **pz**.

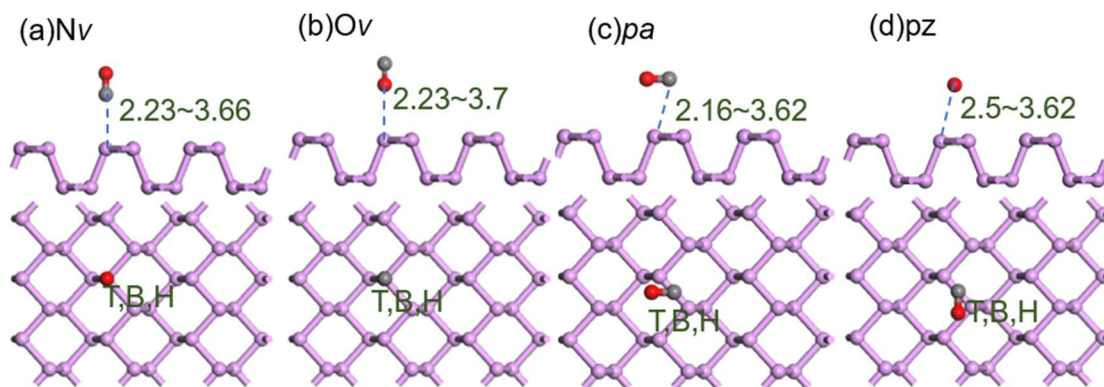

**Figure S14.** Initial configurations of CO molecules adsorbed onto SLBP: (a) **Cv** (b) **Ov**, (c) **pa**, (d) **pz**.

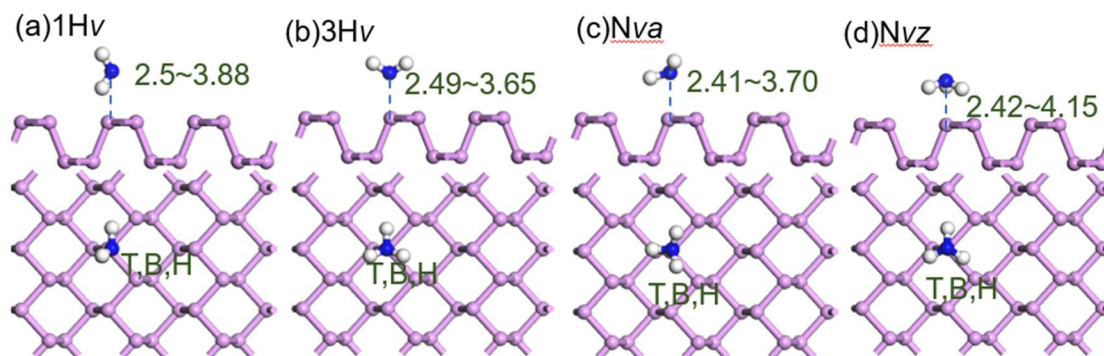

**Figure S15.** Initial configurations of NH<sub>3</sub> molecules adsorbed onto SLBP: (a) **1Hv**, (b) **3Hv**, (c) **Nva**, (d) **Nvz**.

## S2. Calculation Method

In order to ensure the accuracy of the calculation parameters, convergence tests of cutoff energy and k-point were carried out. At k-point  $4 \times 1 \times 3$ , the cutoff energy was set to 250–700 eV for testing. Figure S16a shows that energy convergence is reached when the cutoff energy is 500 eV. Then, the cutoff energy was set to 500 eV, and different k-points ( $4 \times 1 \times 3$ ,  $8 \times 1 \times 6$ ,  $10 \times 1 \times 8$ ) were tested. Figure S16b shows that a k-point larger than  $4 \times 1 \times 3$  cannot induce an impact on energy. Therefore, the cutoff energy and k-point in geometry optimizations or property computations except for DOS were set to 500 eV and  $4 \times 1 \times 3$ , respectively.

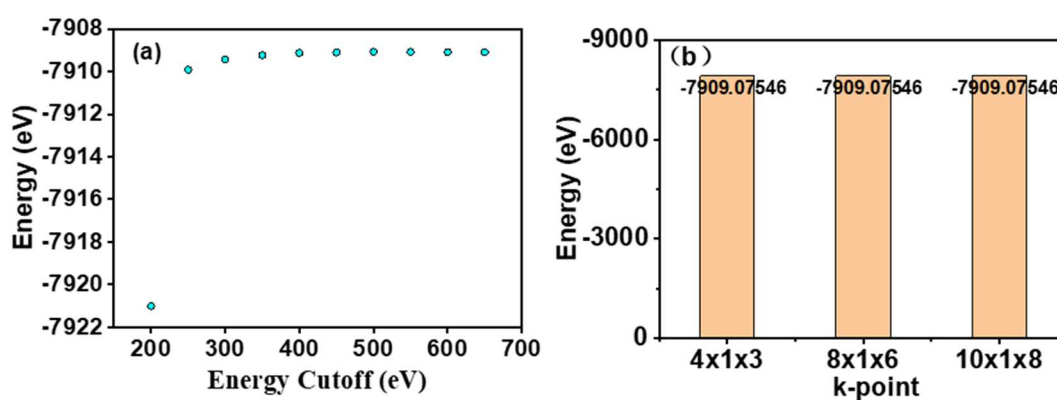

Figure S16. Convergence tests of cutoff energy (a) and k-point grid (b).

The  $d_{\text{shortest}}$  between adsorbed gas molecules and phosphorus atoms in fully-optimized adsorption configuration was measured to evaluate interaction strength. Adsorption energies including ( $E_{\text{ad}}$ ) and not including ( $E_0$ ) vdW interaction energy ( $E_{\text{vdW}}$ ) corrections are calculated following Equations (1) and (2), respectively:

$$E_{\text{ad}} = E_{\text{complex}} - E_{\text{SLBP/d-SLBP}} - E_{\text{gas}} \quad (1)$$

$$E_0 = E'_{\text{complex}} - E'_{\text{SLBP/d-SLBP}} - E'_{\text{gas}} \quad (2)$$

where  $E_{\text{complex}}$ ,  $E_{\text{SLBP/d-SLBP}}$  and  $E_{\text{gas}}$  are total energies including vdW corrections of adsorption complex, SLBP (or d-SLBP) and a gas molecule, respectively;  $E'_{\text{complex}}$ ,  $E'_{\text{SLBP/d-SLBP}}$  and  $E'_{\text{gas}}$  represent total energies without vdW correction. A negative  $E_{\text{ad}}$  value means that the adsorption process is exothermic. An adsorption complex possessing a large negative  $E_{\text{ad}}$  value is thermodynamically more stable than one having a small negative  $E_{\text{ad}}$  value.  $E_{\text{vdW}}$  is calculated following Equation (3).

$$E_{\text{vdW}} = E_{\text{ad}} - E_0 \quad (3)$$

$E_{\text{def}}$  of d-SLBP after adsorbing gas molecules are obtained following Equation (4). Then,  $E_{\text{ad}}$  is corrected by the  $E_{\text{def}}$  values following Equation (5) to generate modified interaction energy ( $E_{\text{ad-def}}$ ) for a d-SLBP adsorbing gas molecule.

$$E_{\text{def}} = E_{\text{d-SLBP(def)}} - E_{\text{d-SLBP}} \quad (4)$$

$$E_{\text{ad-def}} = E_{\text{ad}} - E_{\text{def}} \quad (5)$$

where  $E_{\text{d-SLBP(def)}}$  is the single-point energy of d-SLBP in the fully-optimized geometry of the adsorption complex after removing the gas molecule;  $E_{\text{d-SLBP}}$  is the energy of an individual d-SLBP.

### S3. Computational Results on Adsorption of Gas Molecules on Perfect SLBP

Relationships between  $E_{\text{ad}}$  and  $d_{\text{shortest}}$  are shown in Figure S3 and Figure S4. All **1Ov** or **Ov** configurations for dioxides ( $\text{NO}_2$ ,  $\text{SO}_2$ ,  $\text{CO}_2$ ) exhibit less negative  $E_{\text{ad}}$  values compared with other configurations at similar  $d_{\text{shortest}}$ , and thus are unfavorable to adsorption (Figure S3a–c). For example,  $E_{\text{ad}}$  values for **1Ov** configurations of  $\text{NO}_2$  range from  $-0.133$  to  $-0.047$  eV, whereas those for other configurations vary from  $-0.225$  to  $-0.092$  eV (Figure S3a).  $E_{\text{ad}}$  values of **Sva**, **Svz**, **pz**, **pa** and **2Ovz** configurations of  $\text{SO}_2$  are more negative than that of **1Ov** or **2Ova**, especially at short  $d_{\text{shortest}}$  (Figure S3b).  $E_{\text{ad}}$  values for all **pa** or **pz** configurations of  $\text{CO}_2$  are lower than those for **Ov** vertical configurations (Figure S3c). **Pa** or **pz** configurations of  $\text{SO}_2$  exhibit lower  $E_{\text{ad}}$  values than most other configurations (except for **Svz**), especially at short  $d_{\text{shortest}}$ . The parallel configuration is not favored by  $\text{NO}_2$  according to the  $E_{\text{ad}}$  values (Figure S3a).

Although  $\text{NO}$  (and  $\text{CO}$ ) is a linear molecule similar to  $\text{CO}_2$ , parallel configurations are not energetically more favorable than vertical configurations until  $d_{\text{shortest}} < 2.88$  Å for  $\text{NO}$  (Figure S3d) or  $< 3.39$  Å for  $\text{CO}$  (Figure S3e). For  $\text{NH}_3$ , nitrogen-pointing (**Nva** or **Nvz**) configurations show slightly lower  $E_{\text{ad}}$  values than hydrogen-pointing configurations (**1Hv**, **3Hv**) (Figure S3f). The computational results prove that initial orientations cause remarkable impacts on favorable configurations and  $E_{\text{ad}}$  values for SLBP-adsorbing gas molecules.

For each gas molecule, impacts of initial adsorption sites on fully-optimized configurations and  $E_{\text{ad}}$  values are not as obvious as those of initial orientations (Figure S4). The most stable configurations of  $\text{NO}_2$ ,  $\text{NO}$ ,  $\text{CO}$  and  $\text{NH}_3$  tend to be adsorbed at the H site. The most stable configuration is at the T or H site for  $\text{SO}_2$ , and B site for  $\text{CO}_2$ .

### S4. The Most Stable Configuration of a Gas Molecule on SLBP and Related Disputes

The lowest-energy configuration obtained for  $\text{NO}_2$  is an H type **2Ovz** configuration ( $E_{\text{ad}} = -0.225$  eV) at  $d_{\text{shortest}} = 2.91$  Å (Figure S3a). For **Nva** or **Nvz**, the lowest-energy configuration is an H type **Nva** configuration ( $E_{\text{ad}} = -0.211$  eV,  $d_{\text{shortest}} = 3.18$  Å) or a T type **Nvz** configuration ( $E_{\text{ad}} = -0.202$  eV,  $d_{\text{shortest}} = 2.80$  Å), respectively (Figure S3a). Fully-optimized geometries of these



configurations are shown in Figure S4. Both the nitrogen-pointing configurations exhibit slightly less negative  $E_{ad}$  values than the H type **2Ovz** configuration (Figure S3a).

The most stable configuration for LBP adsorbing NO<sub>2</sub> has been a controversial issue. Cho et al. [4] suggest that two oxygen atoms pointing to LBP is the most stable adsorption configuration for NO<sub>2</sub>, which is structurally close to the cycloaddition adsorption configuration between NO<sub>2</sub> and graphene [5]. The configuration of Cho et al. [4] is structurally similar to the H type **2Ovz** configuration (Figure S5a) in this study. The interaction energy calculated by Cho et al. [4] (−0.273 eV) is a bit lower than the  $E_{ad}$  value (−0.225 eV) calculated for H type **2Ovz** in this study. The small energy difference is most likely attributable to a small cutoff energy (408 eV) or a different size of box (not specified) used in that study.

Both Kou et al. [6] and Cai et al. [7] showed that the nitrogen-pointing configuration is the most favorable adsorption configuration for NO<sub>2</sub> on LBP. Their configurations are structurally similar to the H type **Nva** configuration (Figure S5b) and the T type **Nvz** configuration (Figure S5c) obtained in this study. However, remarkably short distances (2.2 or 2.27 Å) and high adsorption energies (−0.62, −0.5 eV) were reported in their studies, mainly due to employing a local density approximation (LDA) method [6] (the calculation method of Cai et al. [7] was not specified, but the calculation results are close to those of Kou et al. [6]). LDA is well known to underestimate bonding distance and overestimate binding energy in physisorbed systems [8]. According to the calculated  $E_{ad}$  values (Figure S3a), the H type **2Ovz** is a more favorable adsorption configuration than the H type **Nva** or the T type **Nvz** for NO<sub>2</sub> on SLBP.

Two configurations observed for SO<sub>2</sub> showed the lowest energies (Figure S3b), including a T type **pz** ( $E_{ad} = -0.310$  eV,  $d_{shortest} = 2.91$  Å) and an H type **svz** ( $E_{ad} = -0.309$  eV,  $d_{shortest} = 3.07$  Å). Yang et al. [9] and Guo et al. [10] suggest that the most stable adsorption configuration for SO<sub>2</sub> is parallel to LBP at a distance of 2.59 or 2.84 Å, respectively. However, Kaewmaraya et al. [11] indicate that SO<sub>2</sub> prefers to adsorb on the H type site with sulfur pointing to LBP. This dispute over SO<sub>2</sub> is clarified in this study.

Configurations suggested by Yang et al. [9] and Guo et al. [10] are structurally similar to the T type **pz** configuration (Figure S5d) in this study. The distance calculated between SO<sub>2</sub> and SLBP in this study is close to that in the study of Guo et al. [10], but is 0.32 Å larger than that in the study of Yang et al. [9], where the LDA method was used. The configuration of Kaewmaraya et al. [11] is close to the H type **svz** configuration (Figure S5e) in this study. The distance (3.00 Å) between SO<sub>2</sub> and LBP calculated in the study of Kaewmaraya et al. [11] based on projector-augmented wave Perdew–Burke–Ernzerhof method is close to that of H type **svz** in this study, and the  $E_{ad}$  value (−0.33 eV) in that study is a bit lower.

Our results show that both the T type **pz** and the H type **svz** are the most favorable adsorption configurations for SO<sub>2</sub> on LBP. Besides, a T type **pa** configuration at  $d_{shortest} = 3.04$  Å shows a slightly higher  $E_{ad}$  value (−0.301 eV) than the lowest value, and is

also favorable for the adsorption of SO<sub>2</sub> (Figure S5f). In the above *pz* or *pa* configuration, the distance between sulfur and phosphorus atoms is shorter than that between oxygen and phosphorus atoms. This means that the sulfur atom in SO<sub>2</sub> shows higher affinity to LBP than the two oxygen atoms. This is different from NO<sub>2</sub>, for which oxygen atoms show higher affinity to LBP than nitrogen atom.

Three linear molecules, CO<sub>2</sub>, NO and CO, prefer parallel configurations, as indicated by  $E_{ad}$  values (Figure S3c–S3e). The minimum  $E_{ad}$  value for CO<sub>2</sub> corresponds to a B type *pa* configuration at  $d_{shortest} = 3.44$  Å, where CO<sub>2</sub> is almost completely parallel to the SLBP plane with a negligible dihedral angle (Figure S5g). For NO or CO, the lowest-energy configuration is H type *pa*, and the dihedral angle to the SLBP plane is 9°–17° (Figure S5h,i,j). This small dihedral angle is mainly attributed to asymmetry of monoxide molecules. The lowest-energy configuration for NH<sub>3</sub> is an H type *Nva* ( $E_{ad} = -0.207$  eV) at  $d_{shortest} = 3.17$  Å (Figure S3f). The nitrogen atom in both NO (Figure S5h) and NH<sub>3</sub> (Figure S5k) shows high affinity to SLBP, whereas oxygen atoms in NO<sub>2</sub> show high affinity to SLBP (Figure S5a).

## S5. Computational Results on Individual d-SLBP

Fully-optimized geometries of SLBP and d-SLBP are shown in Figure 1. The horizontal and vertical P–P bonds of SLBP were calculated to be 2.22 and 2.26 Å in length, respectively (Figure 1a). The sum of bond angles for each phosphorus atom is 304°. Formation of new P–P bonds or breakage of original P–P bonds is indicated by the length between two phosphorus atoms in the fully relaxed geometries of d-SLBP (Figure 1b–k).

Thermodynamic stabilities of d-SLBP are evaluated by calculating  $E_f$  defined as Equation (6) [12] or (7):

$$E_f(\text{in-plane defect}) = E_{d\text{-SLBP}} - m \times E_P \quad (6)$$

$$E_f(\text{edge defect}) = E_{d\text{-SLBP}} - m \times E_P - k \times \mu_H \quad (7)$$

where  $E_{d\text{-SLBP}}$  represents the vdW force-corrected energy of d-SLBP;  $E_P$  is the energy of each phosphorus atom in SLBP;  $\mu_H$  is chemical potential of one hydrogen atom in an H<sub>2</sub> molecule;  $m$  is the number of phosphorus atoms in d-SLBP;  $k$  is the number of hydrogen atoms added to saturate phosphorus atoms on the edge.

$E_f$  values calculated for d-SLBP range from 1.24 to 4.98 eV (Table S1). A low  $E_f$  value indicates a stable defect [13]. SW defects have the lowest  $E_f$  values (1.24, 1.52 eV) and are the most stable defects in LBP. This is because no bond breakage or formation occurs while forming SW defects. Formation of SW involves only rotation of P–P bonds. SV and DV2 have the second lowest  $E_f$  values (1.77, 1.71 eV), because new bond formation releases energy and compensates partially for the bond breaking energy while forming a defect. DV1 and DV3, together with EGa1 and EGa2, are among the defects possessing the largest  $E_f$  values (3.58–4.94 eV). EGz1 and EGz2 show  $E_f$  values (2.63, 2.82 eV) lower than those of EGa1 and EGa2 (4.77, 4.94 eV). This means

that edge defects formed in the zigzag configuration are much more stable than those formed in the armchair configuration, reflecting the anisotropy of LBP.

**Table S1.** Formation energies ( $E_f$ , eV) of defects in LBP and graphene.

| SLBP    | $E_f$ (This study) | $E_f$ (LBP [12]) | $E_f$ (Graphene [14]) |
|---------|--------------------|------------------|-----------------------|
| Perfect | 0                  | 0                | 0                     |
| SW1     | 1.24               | 1.02 – 1.32      | 4.50 – 5.30           |
| SW2     | 1.52               |                  |                       |
| SV      | 1.77               | 1.63 – 2.03      | 7.38 – 7.85           |
| DV1     | 3.58               | 1.91 – 3.04      | 7.52 – 8.70           |
| DV2     | 1.71               |                  |                       |
| DV3     | 4.43               | – <sup>a</sup>   | 6.40 – 7.50           |
| EGz1    | 2.63               | – <sup>a</sup>   | – <sup>a</sup>        |
| EGz2    | 2.82               | – <sup>a</sup>   | – <sup>a</sup>        |
| EGa1    | 4.77               | – <sup>a</sup>   | – <sup>a</sup>        |
| EGa2    | 4.94               | – <sup>a</sup>   | – <sup>a</sup>        |

a. No available data.

$E_f$  values of d-SLBPs are systematically lower than those of defective graphene (4.5–8.7 eV [14]), meaning defects are easier to form in SLBP than in graphene (Table S1).  $E_f$  values for SW, SV or DV2 calculated in this study are close to the formation energies of similar defects in LBP calculated by Hu et al. [12].  $E_f$  values of DV1 and DV3 are higher than those previously reported [12].

DV1 in this study is structurally similar to the DV-(5|8|5)-1 in the study of Hu et al. [12]. Hu et al. constructed one DV-(5|8|5)-1 in a  $5 \times 1 \times 7$  supercell, which is larger than twice the size of the box used in this study. If considering the two periodic boxes used in this study, there will be one DV1 defect neighbor to the current DV1 defect in each of the *a* and *c* directions. As all DV1 defects are equal, phosphorus atoms between two neighboring defects are not able to move toward any of the defect centers. As a result, single electron orbitals of unsaturated phosphorus atoms in a defect center are not able to overlap. In contrast, phosphorus atoms of an isolated defect in a large supercell are capable of moving slightly toward the defect center, causing a large amount of orbital overlap, and releasing energy to compensate for the bond breaking energy. Therefore, the  $E_f$  value for the same defect calculated in this study is higher than that in the study of Hu et al.

DV3 is constructed by removing two unbonded phosphorus atoms from two neighboring honeycomb structures in this study (Figure S9g). This is different from the DV-(555|777) defect constructed by Hu et al. [12]. DV-(555|777) is constructed by removing two phosphorus atoms in the same honeycomb structure. From a geometry aspect, DV3 in this study could be regarded as two SV defects. As the newly formed P<sub>13</sub>–P<sub>20</sub> single bond in SV lowers the  $E_f$  value, the  $E_f$  value (4.43 eV) of DV3 is slightly higher than the two  $E_f$  values of SV (1.77 eV).

To identify the locations of unpaired single electrons for each d-SLBP, Mulliken population analysis was performed to characterize the spin density in each atom. No atoms carry dangling single electrons in SW1 or SW2, as indicated by zero spin

density (Figure 3a,b), because no phosphorus atoms are removed in construction, albeit the geometry deformation induced by the defect is significant (Figure 1b,c). The distance between unsaturated atoms P<sub>13</sub> and P<sub>17</sub>, or P<sub>15</sub> and P<sub>19</sub> (2.94 Å), in the fully-optimized geometry of DV1 (Figure 1e) is a bit larger than the typical length of a P–P single bond (2.2 Å). Spin densities distributed on the four unsaturated atoms are less than ±0.02 (Figure 3d), thereby not enhancing the interaction with NO<sub>2</sub>. New bonds P<sub>7</sub>–P<sub>22</sub> (2.40 Å) and P<sub>13</sub>–P<sub>20</sub> (2.40 Å) are formed in the fully relaxed geometry of DV2 (Figure 1f). Zero spin density in DV2 (Figure 3e) confirms that there are no unsaturated atoms. Non-zero spin densities in DV3 concentrate mainly on unsaturated atoms P<sub>13</sub>, P<sub>17</sub>, P<sub>30</sub> and P<sub>34</sub>. Dangling single electrons on atoms P<sub>19</sub> and P<sub>20</sub> pair with each other, resulting in zero spin density distribution around the two phosphorus atoms (Figure 3f).

Almost no deformation is observed in the fully relaxed geometry of EGz1 including three inherently unsaturated atoms, P<sub>27</sub>, P<sub>31</sub> and P<sub>35</sub>, on the zigzag edge (Figure 1h). The three phosphorus atoms exhibit the most concentrated spin densities (Figure 3g) and are major locations for single electrons. The fully-relaxed geometry of EGz2 shows slight deformation compared with that of EGz1 due to the absence of P<sub>31</sub> (Figure 1i). Zero spin densities are present for EGz2 (Figure 3h), indicating that single electrons on unsaturated atoms P<sub>27</sub>, P<sub>32</sub>, P<sub>35</sub> and P<sub>36</sub> pair with each other. In the fully relaxed geometry of EGa1, the original bond P<sub>17</sub>–P<sub>22</sub> (2.22 Å) is broken, and the distance between the two phosphorus atoms is elongated to 3.39 Å (Figure 1j). Spin densities on eight unsaturated phosphorus atoms are zero (Figure 3i), indicating that there are no unpaired single electrons in EGa1. Removal of P<sub>21</sub> for constructing EGa2 leads to the formation of a new bond, P<sub>11</sub>–P<sub>22</sub> (2.23 Å), after geometry relaxation (Figure 1k). The vast majority of spin densities (0.75) are concentrated on P<sub>11</sub> (Figure 3j), which is regarded as a main location for single electrons in EGa2.

## S6. Computational Results on Adsorption of Gas Molecules on d-SLBP

$E_{\text{ad}}$  values calculated for all configurations on d-SLBP and most stable adsorption configurations for NO<sub>2</sub>, SO<sub>2</sub> and CO<sub>2</sub> are shown in Table S2 and Figure S17–S19. Table S2 shows the  $E_{\text{ad}}$ ,  $E_{\text{vdW}}/E_{\text{ad}}$  and  $d_{\text{shortest}}$  of the most stable adsorption configuration of the three gases on each d-SLBP. SV, DV3, EGz1 and EGa2 significantly enhance the adsorption of NO<sub>2</sub>, as indicated by the low  $E_{\text{ad}}$  values (−2.584 to −1.304 eV) in the most stable adsorption configurations. vdW force accounts for only 2%–14% of the total  $E_{\text{ad}}$  when  $E_{\text{ad}}$  is lower than −1 eV, implying typical chemical adsorption. In the most stable configuration for each of the four unsaturated d-SLBP, NO<sub>2</sub> combines with P<sub>17</sub> in SV, P<sub>17</sub> in DV3, P<sub>31</sub> in EGz1 and P<sub>11</sub> in EGa2 to form new P<sub>17</sub>–O, P<sub>31</sub>–O and P<sub>11</sub>–O (Figure S17). P<sub>17</sub>, P<sub>11</sub> and P<sub>31</sub> are the atoms with the largest spin densities in the d-SLBP. Therefore, NO<sub>2</sub> was found to bind with a P atom possessing the largest spin density, i.e., the location of a dangling single electron. For d-SLBP exhibiting zero or close to zero spin density, adsorption of NO<sub>2</sub> is not enhanced. For SO<sub>2</sub> and CO<sub>2</sub>, only  $E_{\text{ad}}$  on DV3 is significantly more negative.  $d_{\text{shortest}}$  values between the two gas molecules and d-SLBP not including DV3 are comparable to those for absorption on SLBP (Figures S18 and S19).



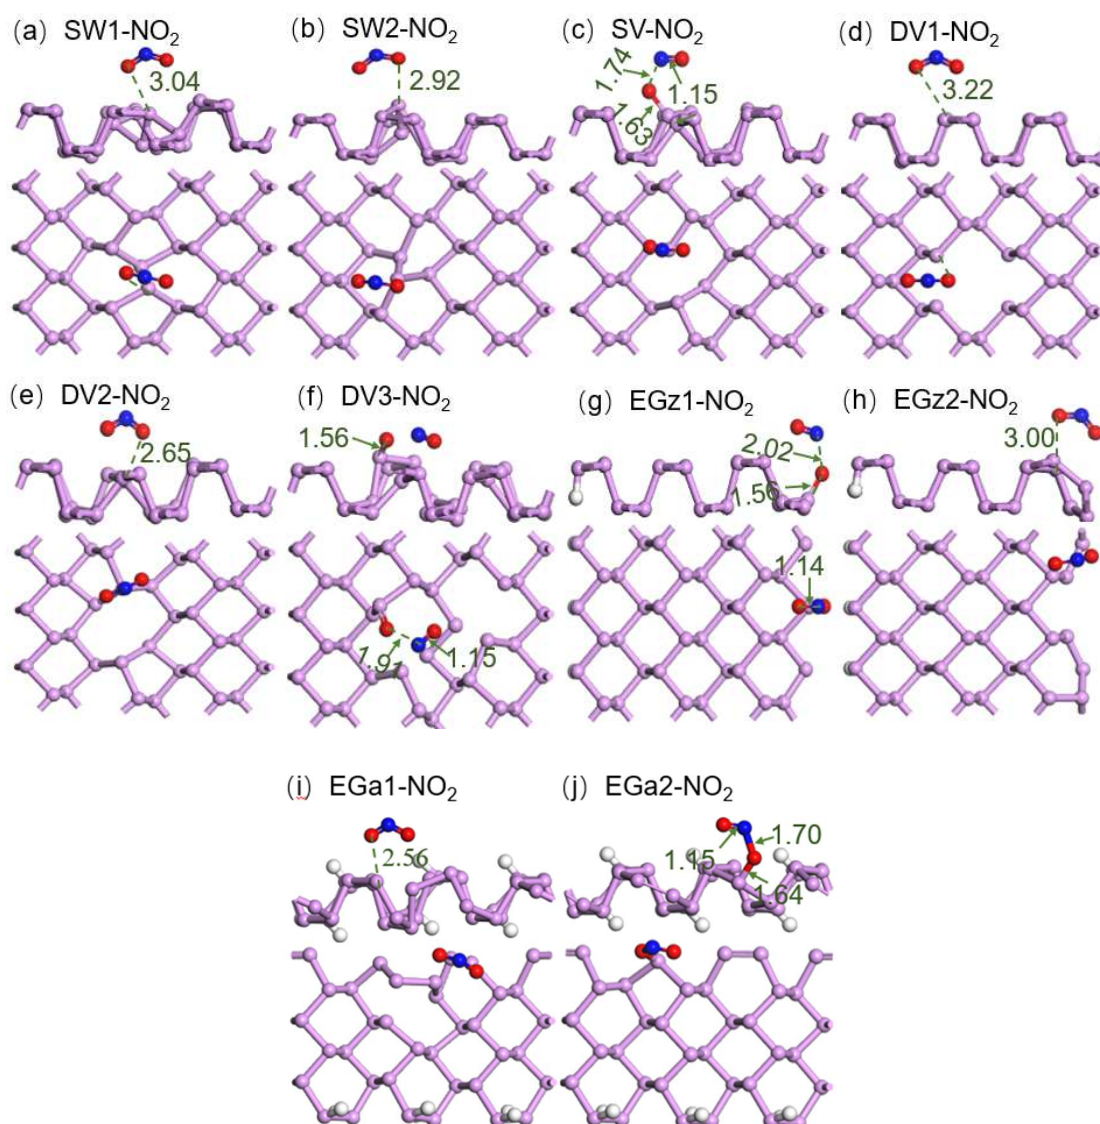

**Figure S17.** Side and top views of the most energetically stable adsorption configurations calculated for  $\text{NO}_2$  and d-SLBP. (a) SW1- $\text{NO}_2$ , (b) SW2- $\text{NO}_2$ , (c) SV- $\text{NO}_2$ , (d) DV1- $\text{NO}_2$ , (e) DV2- $\text{NO}_2$ , (f) DV3- $\text{NO}_2$ , (g) EGz1- $\text{NO}_2$ , (h) EGz2- $\text{NO}_2$ , (i) EGa1- $\text{NO}_2$  and (j) EGa2- $\text{NO}_2$ . Green numbers: the shortest atom distance ( $d_{\text{shortest}}$ ) between d-SLBP and  $\text{NO}_2$ . Pink balls: phosphorus atoms; red balls: oxygen atoms; blue balls: nitrogen atoms; light grey balls: hydrogen atoms.

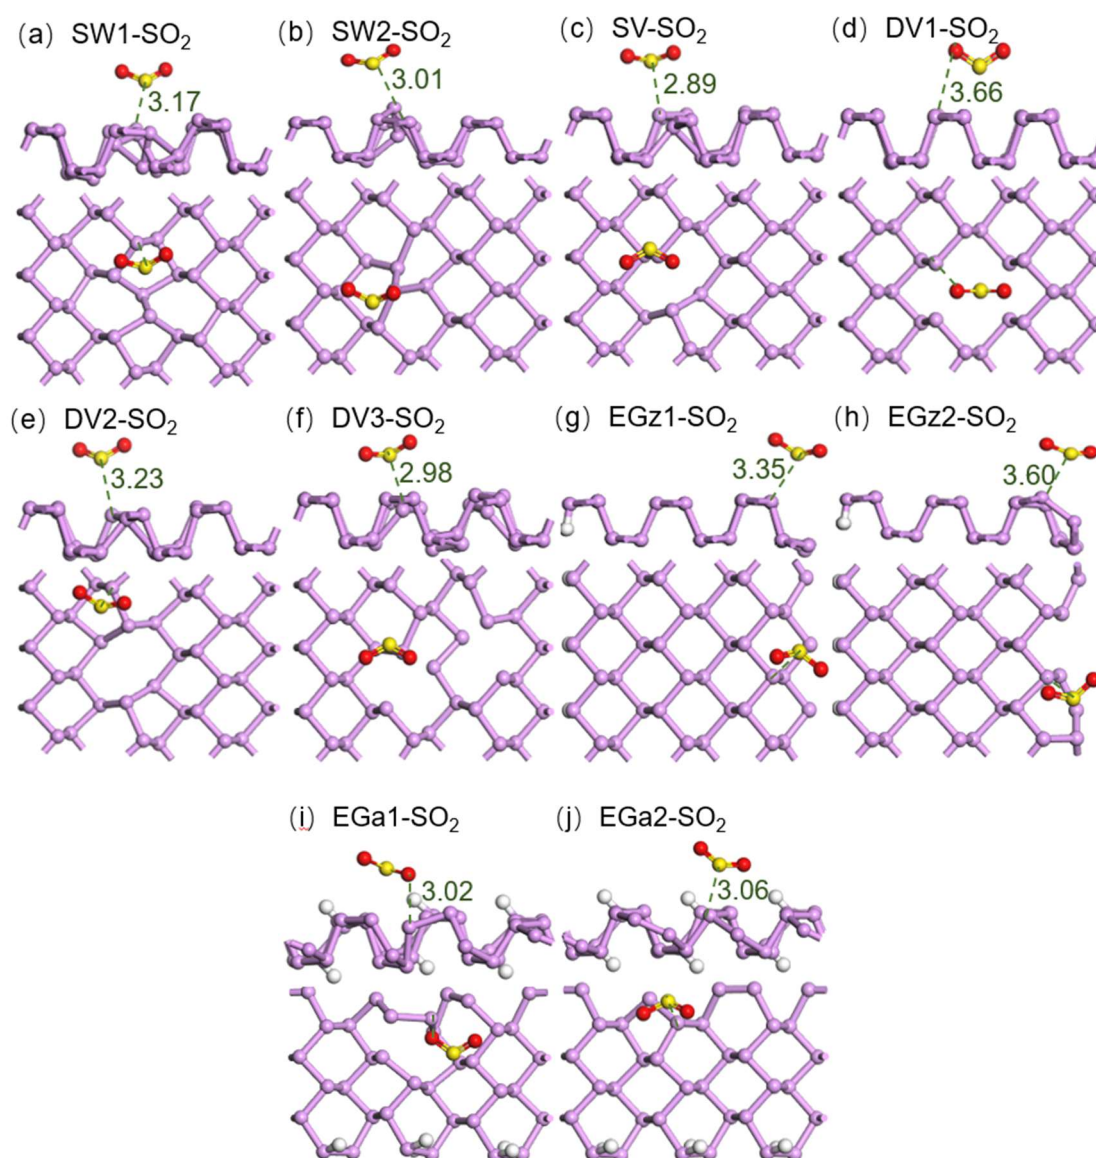

**Figure S18.** Side and top views of the most energetically stable adsorption configurations of  $\text{SO}_2$  on d-SLBP. (a) SW1- $\text{SO}_2$ , (b) SW2- $\text{SO}_2$ , (c) SV- $\text{SO}_2$ , (d) DV1- $\text{SO}_2$ , (e) DV2- $\text{SO}_2$ , (f) DV3- $\text{SO}_2$ , (g) EGz1- $\text{SO}_2$ , (h) EGz2- $\text{SO}_2$ , (i) EGa1- $\text{SO}_2$  and (j) EGa2- $\text{SO}_2$ . Green numbers represent the shortest atom distances ( $d_{\text{shortest}}$ ) between d-SLBP and  $\text{SO}_2$ .

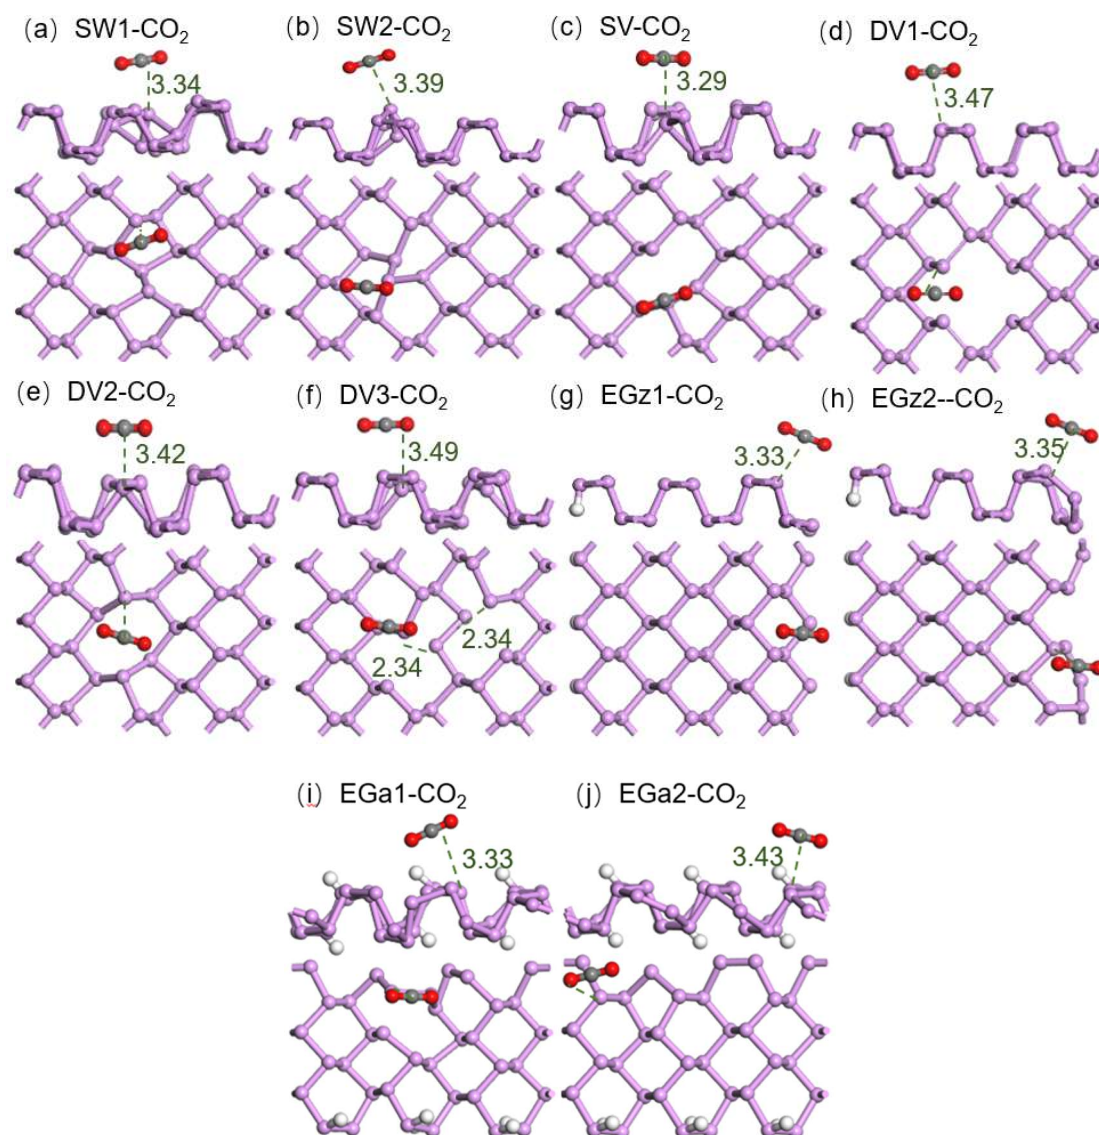

**Figure S19.** Side and top views of the most energetically stable adsorption configurations of CO<sub>2</sub> on d-SLBP. (a) SW1-CO<sub>2</sub>, (b) SW2-CO<sub>2</sub>, (c) SV-CO<sub>2</sub>, (d) DV1-CO<sub>2</sub>, (e) DV2-CO<sub>2</sub>, (f) DV3-CO<sub>2</sub>, (g) EGz1-CO<sub>2</sub>, (h) EGz2-CO<sub>2</sub>, (i) EGa1-CO<sub>2</sub> and (j) EGa2-CO<sub>2</sub>. Green numbers represent the shortest atom distances ( $d_{\text{shortest}}$ ) between d-SLBP and CO<sub>2</sub>.

**Table S2.** Adsorption energies ( $E_{ad}$ , eV),  $E_{vdW}/E_{ad}$  (%), the shortest distances ( $d_{shortest}$ , Å) and charge transfer ( $\Delta q$ , e) of the lowest-energy adsorption configurations of NO<sub>2</sub>, SO<sub>2</sub> and CO<sub>2</sub> on SLBP and each d-SLBP.

| BP   | NO <sub>2</sub> |                  |                |                | SO <sub>2</sub> |                  |                |            | CO <sub>2</sub> |                  |                |            |
|------|-----------------|------------------|----------------|----------------|-----------------|------------------|----------------|------------|-----------------|------------------|----------------|------------|
|      | $E_{ad}$        | $E_{vdW}/E_{ad}$ | $d_{shortest}$ | $\Delta q$     | $E_{ad}$        | $E_{vdW}/E_{ad}$ | $d_{shortest}$ | $\Delta q$ | $E_{ad}$        | $E_{vdW}/E_{ad}$ | $d_{shortest}$ | $\Delta q$ |
| SLBP | -0.225          | 71%              | 2.91           | -0.14          | -0.310          | 63%              | 2.91           | -0.11      | -0.156          | 79%              | 3.44           | -0.01      |
| SW1  | -0.198          | 78%              | 3.04           | -0.11          | -0.256          | 69%              | 3.17           | -0.06      | -0.144          | 103%             | 3.34           | -0.01      |
| SW2  | -0.154          | 65%              | 2.92           | -0.13          | -0.193          | 53%              | 3.03           | -0.06      | -0.098          | 85%              | 3.39           | 0          |
| SV   | -1.433          | 13%              | 1.63           | - <sup>a</sup> | -0.289          | 56%              | 2.89           | -0.10      | -0.144          | 102%             | 3.29           | -0.01      |
| DV1  | -0.198          | 65%              | 3.22           | -0.06          | -0.214          | 89%              | 3.66           | 0.01       | -0.137          | 93%              | 3.47           | 0          |
| DV2  | -0.240          | 65%              | 2.65           | -0.22          | -0.256          | 57%              | 3.23           | -0.05      | -0.162          | 100%             | 3.42           | -0.01      |
| DV3  | -2.584          | 2.6%             | 1.56           | - <sup>a</sup> | -1.378          | 4%               | 2.98           | -0.10      | -1.211          | -1.7%            | 3.49           | 0          |
| EGz1 | -1.304          | 14%              | 1.56           | - <sup>a</sup> | -0.177          | 64%              | 3.34           | -0.04      | -0.132          | 77%              | 3.33           | -0.02      |
| EGz2 | -0.229          | 58%              | 3.00           | -0.11          | -0.165          | 65%              | 3.60           | -0.01      | -0.140          | 81%              | 3.35           | -0.01      |
| EGa1 | -0.255          | 59%              | 2.56           | -0.29          | -0.318          | 69%              | 3.02           | -0.10      | -0.127          | 90%              | 3.35           | -0.02      |
| EGa2 | -1.543          | 2%               | 1.64           | - <sup>a</sup> | -0.200          | 53%              | 3.06           | -0.07      | -0.114          | 99%              | 3.42           | 0          |

a. NO<sub>2</sub> dissociates and transforms into an [NO] species. The nature of [NO] is discussed in S7.

#### S7. Nature of the [NO] Species.

The strong interaction between SV and NO<sub>2</sub> causes N–O bond cleavage to form [NO] species, and simultaneous oxidation of the unsaturated P<sub>17</sub> in SV. To know the nature of [NO], we pulled it away from the main part of SV to construct a desorption system preventing any interaction between the two parts. The desorption configuration after geometry relaxation is shown in Figure S20. The Mulliken atomic population of the desorption configuration was analyzed (Table S3). Total charge distributed on [NO] is zero, and the total spin population is 1. This means that [NO] is a nitrogen monoxide molecule in nature.

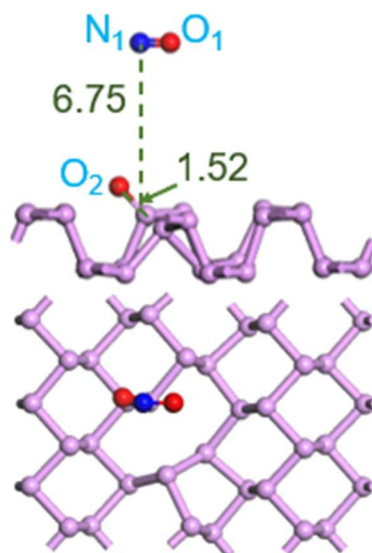

**Figure S20.** Side and top views of the desorption configuration.

**Table S3.** Charge and spin population on each atom in the desorption configuration of SV absorbing NO<sub>2</sub> by Mulliken atomic populations.



| Atom            | Total electrons | charge(e) | Spin(hbar/2) |
|-----------------|-----------------|-----------|--------------|
| N <sub>1</sub>  | 4.84            | 0.16      | 0.70         |
| O <sub>1</sub>  | 6.16            | -0.16     | 0.30         |
| O <sub>2</sub>  | 6.88            | -0.88     | -0.19        |
| P <sub>1</sub>  | 5.01            | -0.01     | 0.00         |
| P <sub>2</sub>  | 4.99            | 0.01      | -0.01        |
| P <sub>3</sub>  | 4.99            | 0.01      | -0.02        |
| P <sub>4</sub>  | 5.00            | -0.00     | -0.00        |
| P <sub>5</sub>  | 5.00            | -0.00     | 0.00         |
| P <sub>6</sub>  | 4.96            | 0.04      | 0.00         |
| P <sub>7</sub>  | 5.05            | -0.05     | -0.07        |
| P <sub>8</sub>  | 4.99            | 0.01      | -0.00        |
| P <sub>9</sub>  | 5.01            | -0.01     | -0.01        |
| P <sub>10</sub> | 4.93            | 0.07      | -0.06        |
| P <sub>11</sub> | 4.99            | 0.01      | -0.00        |
| P <sub>12</sub> | 4.99            | 0.01      | -0.08        |
| P <sub>13</sub> | 5.02            | -0.02     | -0.06        |
| P <sub>14</sub> | 5.00            | -0.00     | -0.04        |
| P <sub>15</sub> | 4.98            | 0.02      | -0.00        |
| P <sub>16</sub> | 5.00            | 0.00      | -0.01        |
| P <sub>17</sub> | 4.17            | 0.83      | -0.29        |
| P <sub>19</sub> | 5.01            | -0.01     | -0.01        |
| P <sub>20</sub> | 5.02            | -0.02     | -0.00        |
| P <sub>21</sub> | 4.98            | 0.02      | -0.03        |
| P <sub>22</sub> | 5.05            | -0.05     | -0.05        |
| P <sub>23</sub> | 5.00            | 0.00      | -0.03        |
| P <sub>24</sub> | 5.00            | 0.00      | 0.00         |
| P <sub>25</sub> | 5.01            | -0.01     | -0.00        |
| P <sub>26</sub> | 5.00            | 0.00      | -0.00        |
| P <sub>27</sub> | 5.00            | 0.00      | -0.00        |
| P <sub>28</sub> | 5.01            | -0.01     | -0.00        |
| P <sub>29</sub> | 4.99            | 0.01      | -0.00        |
| P <sub>30</sub> | 5.00            | 0.00      | -0.00        |
| P <sub>31</sub> | 4.99            | 0.01      | -0.01        |
| P <sub>32</sub> | 5.00            | 0.00      | 0.00         |
| P <sub>33</sub> | 4.99            | 0.01      | -0.00        |
| P <sub>34</sub> | 5.00            | -0.00     | -0.01        |
| P <sub>35</sub> | 5.00            | 0.00      | -0.01        |
| P <sub>36</sub> | 5.00            | 0.00      | -0.00        |

### S8. Deformation of DV3 after interacting with gas molecules

Large  $E_{ad}$  values of dioxideds interacting with DV3 are attributed to the deformation of the defect center. DV3 is severely deformed when a gas molecule is adsorbed. Distances of **P**<sub>17</sub> and **P**<sub>20</sub>, and **P**<sub>19</sub> and **P**<sub>34</sub> are reduced from 3.52 Å to 2.34 Å to form new bonds **P**<sub>17</sub>–**P**<sub>20</sub> and **P**<sub>19</sub>–**P**<sub>34</sub> (Figure S21). The deformed DV3 is structurally similar to those of two independent single-vacancy defects. Table S4 summarizes the deformation energies ( $E_{def}$ ) of all d-SLBP after adsorbing gas molecules.  $E_{def}$  for d-SLBP interacting with NO<sub>2</sub> was calculated to be −0.718 to 0.254 eV (Table S4). After deducing  $E_{def}$  from  $E_{ad}$ , the modified interaction

energy ( $E_{ad-def}$ ) for  $\text{NO}_2$  interacting with DV3 is  $-1.866$  eV, which is comparable to those calculated for SV, EGz1 or EGa2 ( $-1.543$  to  $-1.304$  eV) (Figure S6).

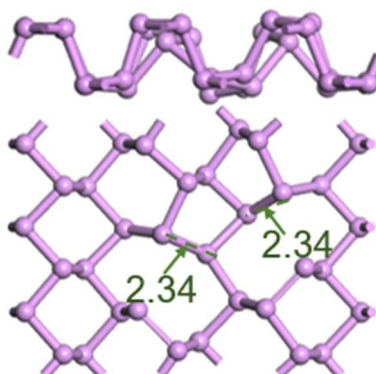

**Figure S21.** Side and top views of deformed DV3 after adsorption.

**Table S4** Interaction energies ( $E_{ad}$ , eV), deformation energies ( $E_{def}$ , eV) and modified interaction energies ( $E_{ad-def}$ , eV) for d-SLBP and dioxides.

| BP   | $\text{NO}_2$ |           |              | $\text{SO}_2$ |           |              | $\text{CO}_2$ |           |              |
|------|---------------|-----------|--------------|---------------|-----------|--------------|---------------|-----------|--------------|
|      | $E_{ad}$      | $E_{def}$ | $E_{ad-def}$ | $E_{ad}$      | $E_{def}$ | $E_{ad-def}$ | $E_{ad}$      | $E_{def}$ | $E_{ad-def}$ |
| SW1  | -0.198        | 0.004     | -0.202       | -0.256        | 0.003     | -0.259       | -0.144        | 0.002     | -0.146       |
| SW2  | -0.154        | 0.034     | -0.188       | -0.193        | 0.030     | -0.224       | -0.098        | -0.002    | -0.096       |
| SV   | -1.433        | 0.188     | -1.620       | -0.289        | 0.009     | -0.298       | -0.144        | 0.013     | -0.157       |
| DV1  | -0.198        | 0.000     | -0.198       | -0.214        | -0.006    | -0.208       | -0.137        | 0.007     | -0.144       |
| DV2  | -0.240        | 0.024     | -0.264       | -0.256        | 0.006     | -0.262       | -0.162        | 0.009     | -0.171       |
| DV3  | -2.584        | -0.718    | -1.866       | -1.378        | -1.076    | -0.302       | -1.211        | -1.074    | -0.137       |
| EGz1 | -1.304        | 0.218     | -1.523       | -0.177        | -0.001    | -0.176       | -0.132        | -0.020    | -0.113       |
| EGz2 | -0.229        | -0.013    | -0.216       | -0.165        | -0.019    | -0.147       | -0.140        | -0.023    | -0.116       |
| EGa1 | -0.255        | 0.033     | -0.288       | -0.318        | 0.008     | -0.326       | -0.127        | -0.001    | -0.126       |
| EGa2 | -1.543        | 0.254     | -1.691       | -0.200        | -0.009    | -0.201       | -0.114        | -0.010    | -0.094       |

### S9. Single-Electron-Dominated Mechanism for SLBP or d-SLBP Absorbing Gas Molecules.

Total (TDOS) and partial DOS (PDOS) calculation results for SLBP or d-SLBP before absorbing gas molecules are shown in Figure S22. The results show that SLBP is a direct semiconductor possessing a bandgap of 0.91 eV (Figure S22a). This bandgap value is close to the lower range of experimental values (1.0–1.5 eV) [15], and in accordance with most GGA-PBE based calculation results (0.86–0.91 eV) [16].

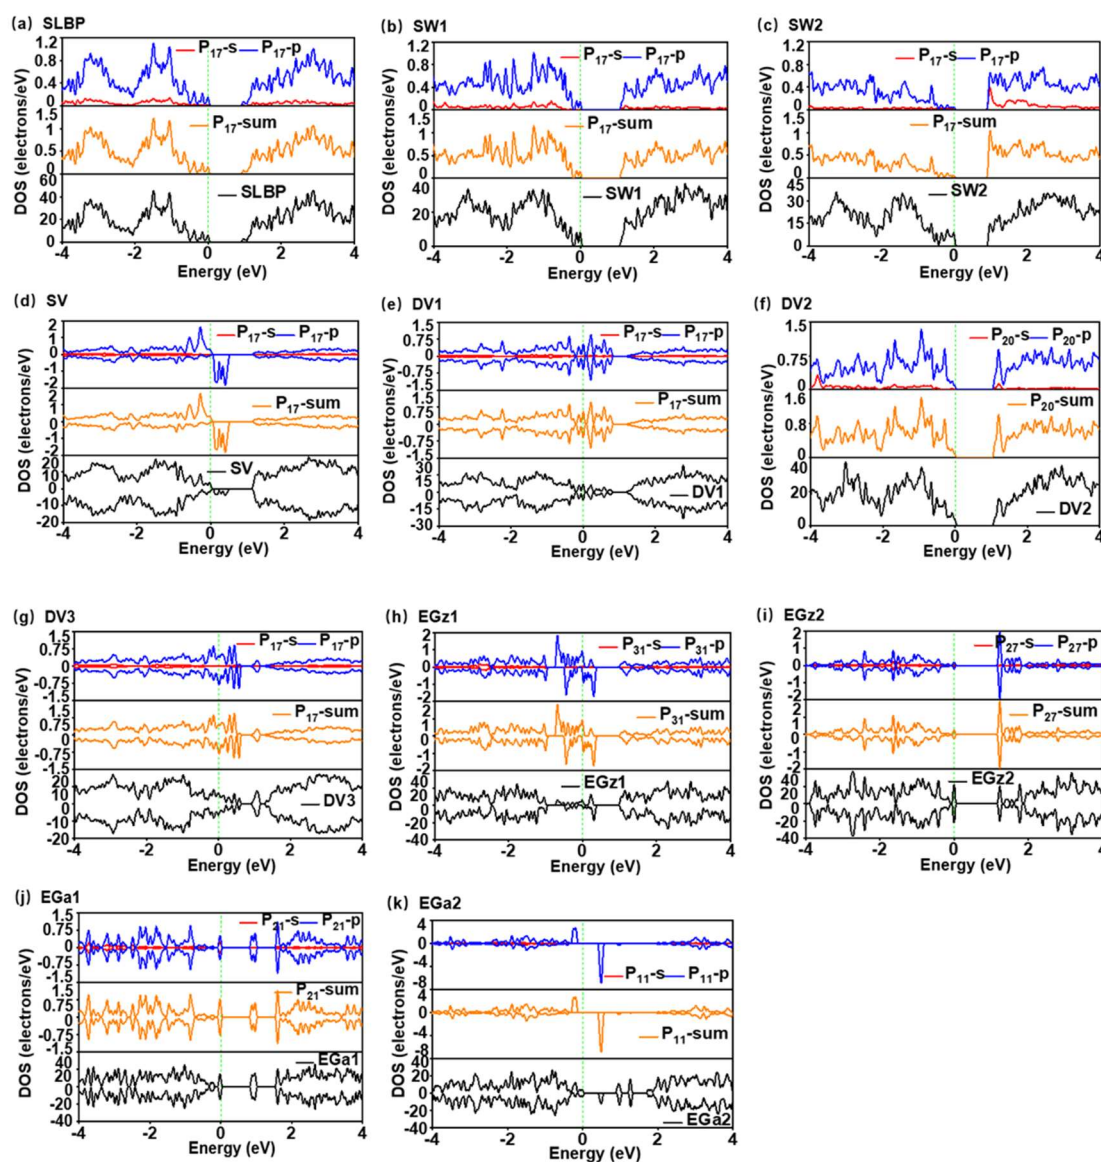

**Figure S22.** Total density of states (TDOS) of SLBP and d-SLBP and partial DOS (PDOS) of key phosphorus atoms contributing to changes of total DOS. (a) Atom  $P_{17}$  in SLBP, (b) atom  $P_{17}$  in SW1, (c) atom  $P_{17}$  in SW2, (d) atom  $P_{17}$  in SV, (e) atom  $P_{17}$  in DV1, (f) atom  $P_{20}$  in DV2, (g) atom  $P_{17}$  in DV3, (h) atom  $P_{31}$  in EGz1, (i) atom  $P_{27}$  in EGz2, (j) atom  $P_{21}$  in EGa1 and (k) atom  $P_{11}$  in EGa2. Green dashed line: Fermi level.

Introducing defect SW1, SW2 or DV2 carrying no unpaired electrons cannot change semiconducting nature, albeit causing a slight impact on electronic structure and bandgap (Figure S22b,c,f). In DOS of other defects, new states appear near or above the Fermi level (Figure S22d,e,g–k). TDOS of DV1, EGz2 or EGa1 is spin symmetric, in accordance with zero or negligible spin populations. Atoms  $P_{17}$  in DV1,  $P_{27}$  in EGz2 and  $P_{21}$  in EGa1 were selected as representatives to examine PDOS. The PDOS is symmetric (Figure S22e,i,j), further confirming that all orbitals are occupied by electrons and no atoms carry unpaired single electrons in DV1, EGz2 or EGa1.

TDOS of SV, EGz1 and EGa2 are obviously spin-asymmetric (Figure S22d,h,k). As shown in PDOS, the spin asymmetry is mainly contributed by the spin-asymmetric  $p$  orbital of the unsaturated atom  $P_{17}$  in SV,  $P_{31}$  in EGz1 or  $P_{11}$  in EGa2. This is owed to the presence of a single electron in the  $p$  orbital according to the non-zero spin population. DV3 is special due to possessing symmetric TDOS but asymmetric PDOS, taking atom  $P_{17}$  as an example (Figure S22g). This is attributed to the non-zero spin population on atom  $P_{17}$ . Similarly,  $p$  orbitals of the other three unsaturated atoms  $P_{13}$ ,  $P_{30}$  and  $P_{34}$  are spin-asymmetric. However, as spin-up offsets spin-down, no asymmetry can be observed in TDOS of DV3. The four single-electron d-SLBP all have spin-asymmetric TDOS or PDOS.

For SLBP, flat bands occur near the Fermi level and spin polarization is generated after adsorbing an  $NO_2$  or  $NO$  containing a single electron (Figure S23a,d). According to DOS patterns, the flat band and spin-polarized electron is mainly located in  $NO_2$  or  $NO$ . For  $NO_2$ , a flat band with spin-down electron appears above the Fermi level. Although  $NO_2$  produces a doping state, the orbital overlap between  $NO_2$  and SLBP is not as much as that of  $SO_2$  and SLBP. The orbital overlap of  $SO_2$  and SLBP is the largest among the six gas molecules (Figure S23b), which is consistent with its most negative  $E_{ad}$  value. SLBP retains semiconductor characteristics as a direct bandgap after interacting with  $SO_2$ ,  $CO_2$ ,  $CO$  or  $NH_3$  ( $E_g = 0.907$ – $0.946$  eV).  $SO_2$  induces some states in the conduction band at around 1 eV. Adsorption of  $CO_2$ ,  $CO$  or  $NH_3$  to SLBP produces no noticeable change to DOS near the Fermi level (Figure S23c,e,f), which manifests the weak vdW force between SLBP and gas.

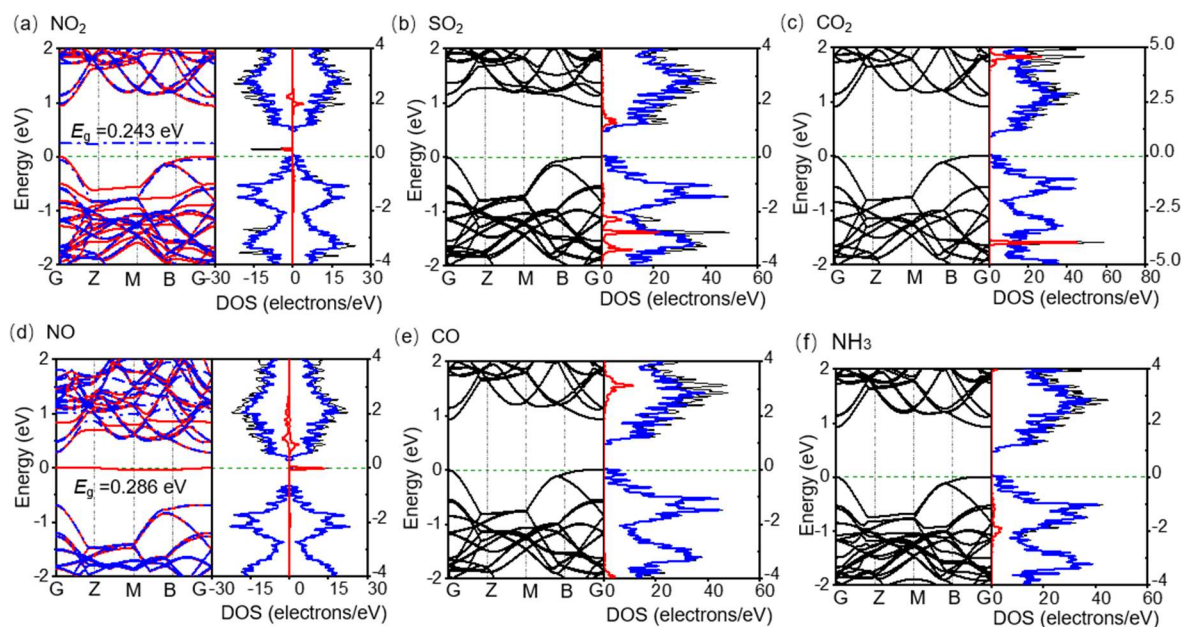

**Figure S23.** Band structures and DOS patterns of SLBP and gas adsorption complexes. (a)  $NO_2$ , (b)  $SO_2$ , (c)  $CO_2$ , (d)  $NO$ , (e)  $CO$ , (f)  $NH_3$ . In each band structure pattern, a red solid line and blue dashed line are spin-up and spin-down for  $NO_2$  and  $NO$ ; other bands are represented by black solid lines. In a DOS pattern, a black solid line is TDOS; a blue solid line is DOS of SLBP in an adsorption complex; a red solid line is the DOS of the gas molecule in the adsorption complex.



TDOS and PDOS of adsorption complexes of d-SLBP are shown in Figures S24–S26. Since  $\text{NO}_2$  is a paramagnetic single-electron gas, the introduction of  $\text{NO}_2$  causes asymmetric spin-up and spin-down polarization in all the d-SLBP except for EGa2. This asymmetry can be divided into two categories. One is SW1, SW2, DV1, DV2, EGz2 and EGa1; and the other is SV, DV3 and EGz1 (Figure S24). For defects of the first type, they do not contain single electrons. Since there is no single electron that can interact with these  $\text{NO}_2$ , the whole system exhibits spin asymmetry, which is mainly derived from the nitrogen and oxygen of  $\text{NO}_2$ .

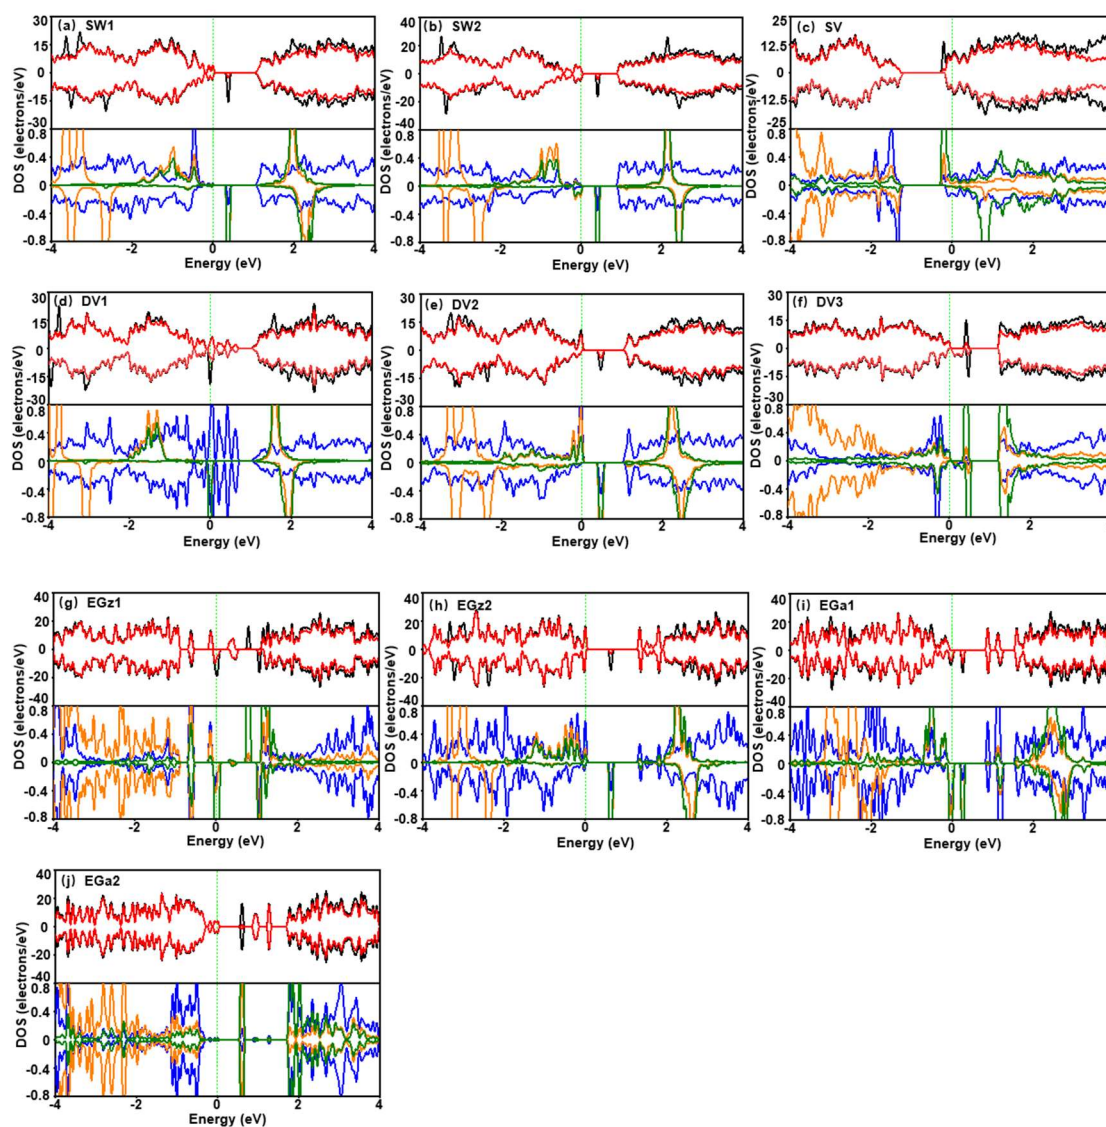

**Figure S24.** TDOS of adsorption complexes of d-SLBP and  $\text{NO}_2$  (black solid line) and PDOS of d-SLBP (red solid line) in adsorption complexes (upper panel). (a) SW1, (b) SW2, (c) SV, (d) DV1, (e) DV2, (f) DV3, (g) EGz1, (h) EGz2, (i) EGa1 and (j) EGa2. PDOS of  $p$  orbitals of nitrogen (orange solid line) and oxygen (the one closer to adsorbate, dark green solid line) atoms and the phosphorus atom (blue solid line) nearest to  $\text{NO}_2$  (lower panel). Green dashed line: Fermi level.

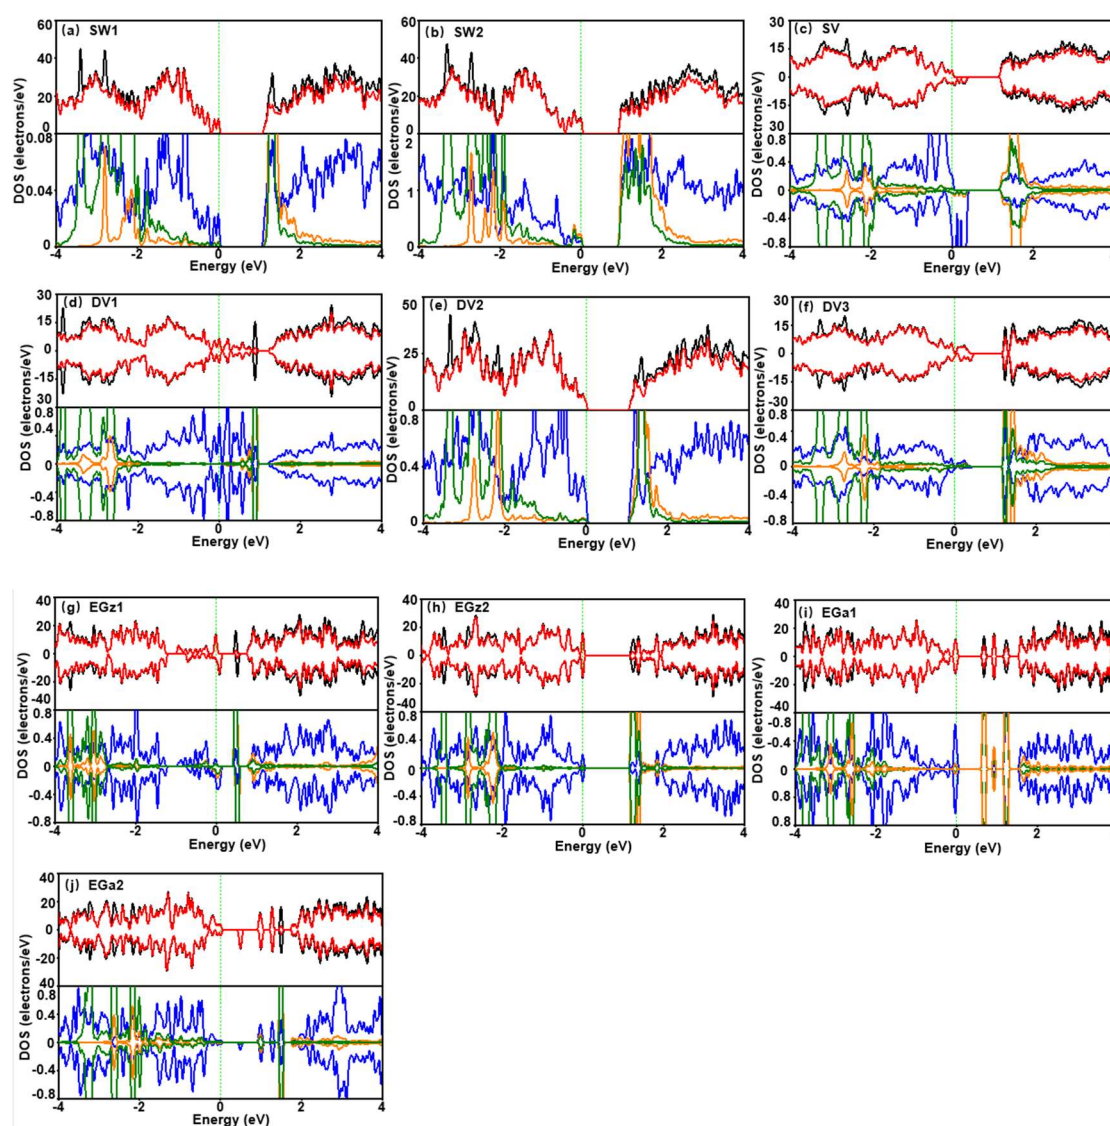

**Figure S25.** TDOS of adsorption complexes of d-SLBP and SO<sub>2</sub> (black solid line) and PDOS of d-SLBP (red solid line) in adsorption complexes (upper panel). (a) SW1, (b) SW2, (c) SV, (d) DV1, (e) DV2, (f) DV3, (g) EGz1, (h) EGz2, (i) EGa1 and (j) EGa2. PDOS of *p* orbitals of sulfur (orange solid line) and oxygen (the one closer to adsorbate, dark green solid line) atoms and the phosphorus atom (blue solid line) nearest to SO<sub>2</sub> (lower panel). Green dashed line: Fermi level.

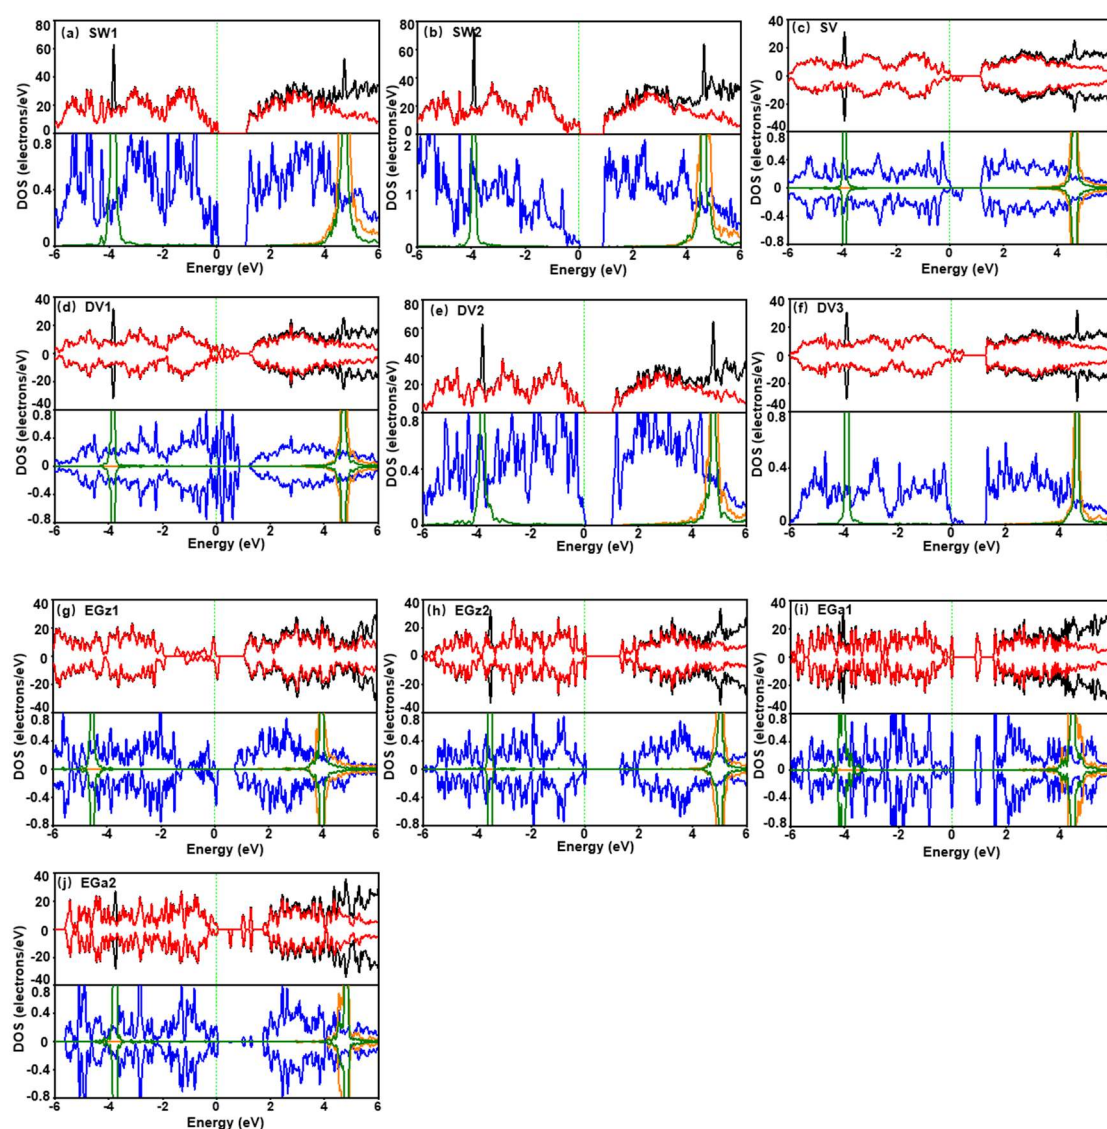

**Figure S26.** TDOS of adsorption complexes of CO<sub>2</sub> and d-SLBP (black solid line) and PDOS of d-SLBP (red solid line) in adsorption complexes (upper panel). (a) SW1, (b) SW2, (c) SV, (d) DV1, (e) DV2, (f) DV3, (g) EGz1, (h) EGz2, (i) EGa1 and (j) EGa2. PDOS of *p* orbitals of carbon (orange solid line) and oxygen (the one closer to adsorbate, dark green solid line) atoms and the phosphorus atom (blue solid line) nearest to CO<sub>2</sub> (lower panel). Green dashed line: Fermi level.

For the defects of the second type, individual SV or EGz1 own an odd number of single electrons, as shown by symmetric TDOS (Figure S22d,h), and DV3 owns an even number of single electrons, as shown by symmetric TDOS (Figure S22g). The single electrons can interact strongly with the single electrons in NO<sub>2</sub>. This strong interaction causes the dissociation of NO<sub>2</sub> to form NO, which can be regarded as a system of single-electron NO and oxidation-d-SLBP. This asymmetry stems not only from nitrogen and oxygen, but also from the unsaturated P<sub>17</sub>, P<sub>17</sub> and P<sub>31</sub> in SV, DV3 and EGz1. For EGa2, it also contains a single electron (Figure S22k) that interacts strongly with NO<sub>2</sub>, but it does not dissociate from NO<sub>2</sub>. According to the lowest energy and Pauli exclusion

principle [23], the single electrons of EGa2 and undissociated NO<sub>2</sub> tend to pair with each other to form a stable structure, thereby exhibiting a distinct spin symmetry.

Since there is no single electron in SO<sub>2</sub> or CO<sub>2</sub>, the original spin characteristics of the d-SLBP are still maintained after combination (Figures S25 and S26), and no major changes in the electronic properties of the d-SLBP are caused, which is consistent with their smaller  $E_{ad}$ . Differently from NO<sub>2</sub> adsorption, SO<sub>2</sub> and CO<sub>2</sub> have no continuous orbital overlap in the single-electron defects of SV, DV3, EGz1 and EGa2. In all d-SLBP, they exhibited weaker orbital hybridization, which is supported by the smaller charge transfer (−0.11 to 0.01 e or −0.02 to 0 e).

In comparison with SO<sub>2</sub> or CO<sub>2</sub>, the orbital overlap of NO and unsaturated d-SLBP is strong (Figure S8). Spin asymmetry was observed in the adsorption complex of NO formed with DV3, but not in the adsorption complexes formed with SV, EGz1 or EGa2. The adsorption complex of NO with EGz1 showed clear spin symmetry similar to that with SV or EGa2. However, the orbital overlap of NO with EGz1 was not as strong as that with SV or EGa2. The weak orbital hybridization was in accordance with the adsorption distance (1.98 Å, Figure S7c) between EGz1 and NO, which is slightly larger than the length of a P–N single bond. Additionally, the  $E_{ad}$  of EGz1 and NO are less negative than those of other unsaturated defects and NO. As for DV3 containing an even number of single electrons, the orbital symmetry of DV3 disappeared after being combined with NO. The adsorption complex of DV3 and NO showed obvious spin asymmetry near the Fermi level. According to PDOS, this spin asymmetry mainly comes from the defective phosphorus atoms of DV3.

## S10. Experimental Details

**Materials.** Bulk black phosphorus (purity >99.998%) were bought from Nanjing XF NANO Materials Tech Co., Ltd. NO<sub>2</sub> gas was purchased from Beijing Lvyuan Dade Biological Tech Co., Ltd. (The certification of standard materials indicates that NO<sub>2</sub> was 200 ppm, and the rest was N<sub>2</sub>.) High purity CO<sub>2</sub> and N<sub>2</sub> were obtained from Shenyang Shuntai Special Gas Co., Ltd. (The purity was greater than 99.5%.) Ultrapure water was obtained with a Millipore- Milli Q system.

**Preparation Methods of LBP.** LBP suspension was prepared by sonication of bulk black phosphorus in anaerobic water. Bulk black phosphorus was ground into a powder with an agate mortar in the glove box. The powder was dispersed in anaerobic water and sonicated for 12 hours. An ice bath was used to keep the temperature below 10 °C during sonication. Anaerobic water was prepared in a 250 mL anaerobic bottle continuously filled with N<sub>2</sub> while heating. The suspension was centrifuged at 10,000 rpm for 30 min.

**Characterization and Analysis Methods.** Raman spectroscopy (Thermo scientific DXR) was used to characterize LBP (Figure S27a). Three prominent peaks, i.e., A<sub>g</sub><sup>1</sup> (out-of-plane phonon modes, assigned to 364 cm<sup>−1</sup>), B<sub>2g</sub> and A<sub>g</sub><sup>2</sup> (in-plane modes, assigned to 439 and 466 cm<sup>−1</sup>) are consistent with a previous report [17], confirming the successful exfoliation of LBP. A transmission electron microscope (TEM, JEM-2100F) was used to characterize the morphology of LBP. LBP has a thin layered structure with an obvious



edge structure. X-ray photoelectron spectroscopy (XPS, ESCALAB250, Thermo VG) was used to identify phosphorus components of LBP after treatment with  $N_2$ ,  $NO_2$  or  $CO_2$ .

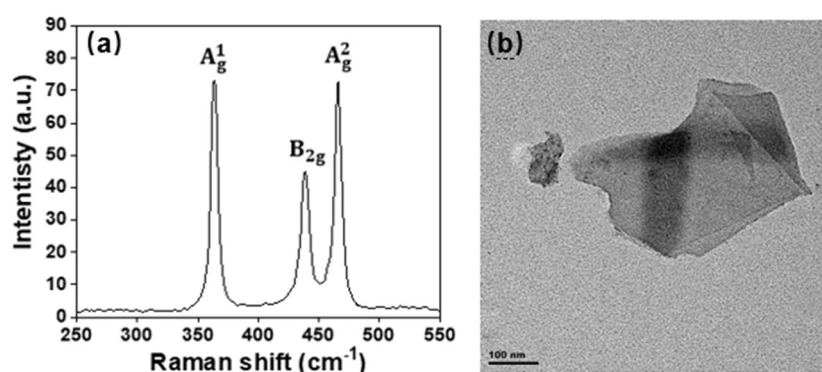

**Figure S27.** Characterizations of LBP. (a) Raman spectrum of LBP; (b) TEM image of LBP.

## References

- [1] Hiroshi, K.; Keiji, M.; Kenichi, F.; Tejiro, Y. The electronic structures of  $NO_2$ ,  $NO_2^+$  and  $NO_2^-$ . *Bull. Chem Soc Jpn* **1964**, *37*, 11.
- [2] Fourre, I.; Silvi, B. What can we learn from two-center three-electron bonding with the topological analysis of ELF? *Heteroatom Chem* **2007**, *18*, 135–160.
- [3] Frenking, G.; Loschen, C.; Krapp, A.; Fau, S.; Strauss, S.H. Electronic structure of CO—an exercise in modern chemical bonding theory. *J Comput Chem* **2007**, *28*, 117–26.
- [4] Cho, S.Y.; Lee, Y.; Koh, H.J.; Jung, H.; Kim, J.S.; Yoo, H.W.; Kim, J.; Jung, H.T. Superior chemical sensing performance of black phosphorus: Comparison with  $MoS_2$  and graphene. *Adv. Mater.* **2016**, *28*, 7020–7028.
- [5] Zhang, Y.H.; Chen, Y.B.; Zhou, K.G.; Liu, C.H.; Zeng, J.; Zhang, H.L.; Peng, Y. Improving gas sensing properties of graphene by introducing dopants and defects: A first-principles study. *Nanotechnology* **2009**, *20*, 185504.
- [6] Kou, L.; Frauenheim, T.; Chen, C. Phosphorene as A superior gas sensor: Selective adsorption and distinct I-V response. *J. Phys. Chem. Lett.* **2014**, *5*, 2675–2681.
- [7] Cai, Y.; Ke, Q.; Zhang, G.; Zhang, Y.W. Energetics, charge transfer, and magnetism of small molecules physisorbed on phosphorene. *J. Phys. Chem. C* **2015**, *119*, 3102–3110.
- [8] Giannozzi, P.; Car, R.; Scoles, G. Oxygen adsorption on graphite and nanotubes. *J Chem Phys* **2003**, *118*, 1003–1006.
- [9] Yang, Q.; Chen, X.P.; Meng, R.S.; Jiang, J.-K.; Liang, Q.H.; Tan, C.J.; Cai, M.; Sun, X.; Yang, D.G.; Ren, T.L. First-principles study of sulfur dioxide sensor based on phosphorenes. *IEEE Electron Device Lett.* **2016**, *37*, 660–662.



- [10] Guo, S.; Yuan, L.; Liu, X.; Zhou, W.; Song, X.; Zhang, S. First-principles study of SO<sub>2</sub> sensors based on phosphorene and its isoelectronic counterparts: GeS, GeSe, SnS, SnSe. *Chem. Phys. Lett.* **2017**, *686*, 83–87.
- [11] Kaewmaraya, T.; Ngamwongwan, L.; Moontragoon, P.; Karton, A.; Hussain, T. Drastic improvement in gas-sensing characteristics of phosphorene nanosheets under vacancy defects and elemental functionalization. *J. Phys. Chem. C* **2018**, *122*, 20186–20193.
- [12] Wei, H.; Yang, J.Y. Defects in phosphorene. *J. Phys. Chem. C* **2015**, *119*, 20474–20480.
- [13] Farooq, M.U.; Hashmi, A.; Hong, J. Anisotropic bias dependent transport property of defective phosphorene layer. *Sci. Rep.* **2015**, *5*, 12482.
- [14] Banhart, F.; Arkady, V.K.; Kotakoski, J. Structural defects in graphene. *ACS Nano* **2011**, *5*, 26–41.
- [15] Liu, H.; Zhu, Z.; Luo, Z.; Xu, X.F.; Tomanek, D.; Ye, P.D. Phosphorene: An unexplored 2D semiconductor with A high hole mobility. *ACS Nano* **2014**, *8*, 4033–4041.
- [16] Mahabal, M.S.; Deshpande, M.D.; Hussain, T.; Ahuja, R. Sensing characteristics of phosphorene monolayers toward PH<sub>3</sub> and AsH<sub>3</sub> gases upon the introduction of vacancy defects. *J. Phys. Chem. C* **2016**, *120*, 20428–20436.
- [17] Zhao, Q.; Ma, W.; Pan, B.; Zhang, Q.; Zhang, X.; Zhang, S.; Xing, B. Wrinkle-induced high sorption makes few-layered black phosphorus: A superior adsorbent for ionic organic compounds. *Environ. Sci. Nano* **2018**, *5*, 1454–1465.
